1 **Development of a Novel Class of Self-Assembling dsRNA**

2 **Cancer Therapeutics: a Proof of Concept Investigation**

3

4 Vishwaratn Asthana\*, Brett S. Stern, Yuqi Tang, Pallavi Bugga, Ang Li, Adam

5 Ferguson, Anantratn Asthana, Gang Bao, Rebekah A. Drezek

6

7 Department of Bioengineering, Rice University, Houston, Texas, United States of

8 America

9 \* Corresponding author

10 E-mail: [asthana.vishwaratn@gmail.com](mailto:asthana.vishwaratn@gmail.com) (VA)

11

12

13

14

15

16

17

18

19

20

21

22

23

## 22 **Abstract**

23 Cancer has proven to be an extremely difficult challenge to treat. Several  
24 fundamental issues currently underlie cancer treatment including differentiating  
25 self from non-self, functional coupling of the recognition and therapeutic  
26 components of various therapies, and the propensity of cancerous cells to develop  
27 resistance to common treatment modalities via evolutionary pressure. Given these  
28 limitations, there is an increasing need to develop an all-encompassing therapeutic  
29 that can uniquely target malignant cells, decouple recognition from treatment, and  
30 overcome evolutionarily driven cancer resistance. We describe herein, a new class  
31 of programmable self-assembling dsRNA-based cancer therapeutics, that uniquely  
32 targets aberrant genetic sequences, and in a functionally decoupled manner,  
33 undergoes oncogenic RNA activated displacement (ORAD), initiating a therapeutic  
34 cascade that induces apoptosis and immune activation. As a proof-of-concept, we  
35 show that RNA strands targeting the EWS/Fli1 fusion gene in Ewing Sarcoma cells  
36 that are end-blocked with phosphorothioate bonds and additionally sealed with a  
37 2'-U modified DNA protector can be used to induce specific and potent killing of cells  
38 containing the target oncogenic sequence, but not wildtype.

39

40

41

42

## 43 **Introduction**

44 Cancer is the second leading cause of death globally, and was responsible for  
45 8.8 million deaths in 2015 according to the World Health Organization (1).  
46 Currently, the gold standard of care for cancer is some combination of  
47 chemotherapy, hormonal therapy, targeted molecular therapy, radiation, and/or  
48 surgical resection. However, each of these approaches are to varying degrees, non-  
49 specific, leading to undesirable side effects on healthy tissue (2). In addition, with  
50 many of these therapies, especially targeted molecular therapy, the method of  
51 recognition and method of efficacy are intricately coupled. As a result, the choice of  
52 target affects the efficacy of therapy, often producing suboptimal results (2). A good  
53 example of this is antisense small interfering RNA (siRNA) technology. siRNA is  
54 highly specific, targeting strands with sequence complementarity to the therapeutic  
55 silencing RNA strand; however, siRNA's mechanism of action involves cleaving and  
56 degrading the target strand. It is entirely possible that the unique cancerous  
57 sequence being targeted is not essential for driving the cancerous phenotype and so  
58 its degradation has limited benefits. One of the last major issues with conventional  
59 therapies is that evolutionary pressure often drives cancerous cells to adopt a  
60 resistant phenotype leading to refractoriness/remission (3). Given these limitations,  
61 there is an increasing need for a new class of all-encompassing cancer therapeutics  
62 that can uniquely target malignant cells, decouple recognition from treatment, and  
63 circumvent cancer resistance.

64 A fundamental difference between malignant cells and normal tissue is the  
65 presence of genetic mutations. Unique mutations can be identified during the

66 pathological staging of biopsy samples using mutation panels or Next Generation  
67 Sequencing (4,5). A method of targeting these genetic mutations, possibly multiple  
68 at once, represents an ideal form of personalized medicine and would allow for the  
69 selective identification of cancerous cells. Here, we describe a new class of RNA-  
70 based cancer therapeutics called ORAD (Oncogenic RNA Activated Displacement)  
71 that targets mutated cancerous mRNA in a selective and programmable manner  
72 based on simple Watson-Crick thermodynamic base-pairing rules.

73         The ORAD system is composed of a targeting RNA strand and a  
74 complementary DNA protector. As depicted in Figure 1, when the RNA/DNA duplex  
75 encounters a wildtype strand with insufficient complementarity, the DNA protector  
76 fails to release, leading to no response. However, when the targeted cancerous  
77 sequence is encountered, the cancerous mRNA is able to dislodge the DNA protector  
78 via strand displacement, producing a therapeutic double stranded RNA (dsRNA)  
79 product. We found that by end-blocking the targeting RNA with phosphorothioate  
80 bonds to prevent non-specific degradation, and modifying the DNA protector with  
81 2'-U residues to render the RNA/DNA duplex inert prior to opening, premature  
82 activation of the ORAD system in cells not harboring the target oncogenic sequence  
83 can be prevented.

84         In general, RNA/RNA base pairing is more thermodynamically favorable than  
85 RNA/DNA base pairing, enabling DNA protector displacement in the presence of a  
86 cancerous mRNA target even though their sequences are almost entirely  
87 homologous (6-10). The use of a DNA protector to confer selectivity was first  
88 demonstrated by Zhang et al., 2012 and has been validated to ensure near-optimal

89 specificity across the diverse concentrations, sequence compositions, and salinities  
90 that may be encountered intracellularly (11). An in depth explanation of the probe-  
91 protector system can be found in the Supplementary Text.

92 Long dsRNA, or more precisely strands greater than 30 base pairs (bp), are  
93 considered foreign elements in eukaryotic cells (12). dsRNA is typically found among  
94 viruses possessing dsRNA genomes or dsRNA intermediates during replication.  
95 Accordingly, higher-level organisms have adopted mechanisms of identifying long  
96 dsRNA and responding to the infectious source (13). In humans, several key proteins  
97 recognize long dsRNA. These include protein kinase R (PKR), Toll-like receptor 3  
98 (TLR3), Melanoma differentiation-associated protein 5 (MDA5), retinoic acid-inducible  
99 gene I (RIG-I), and 2'-5'-oligoadenylate synthase (OAS). PKR is an intracellular protein  
100 that binds dsRNA in a length dependent fashion and induces apoptosis in the host cell to  
101 prevent viral propagation (12). TLR3, MDA5, and RIG-I also recognize dsRNA and play  
102 an active role in immune activation. TLR3 is a surface receptor expressed primarily on  
103 antigen presenting cells, while MDA5 and RIG-I are cytoplasmic helicase receptors  
104 expressed in almost all cell types. These three proteins function in innate immunity by  
105 recognizing dsRNA and activating NF- $\kappa$ B or interferon regulatory factors, leading to  
106 production of inflammatory cytokines, such as type I interferons (14-21). RIG-I and  
107 MDA5 also possess caspase recruitment domains (CARD) capable of inducing apoptosis  
108 when activated (22). Lastly, OAS, in response to dsRNA, produces 2'-5'-oligoadenylates,  
109 which activate ribonuclease L (RNase L) leading to the destruction of both viral and  
110 endogenous mRNA in the cell (23,24).

111 By producing a long dsRNA product, the ORAD system falsely alerts the cell,  
112 and possibly whole body, of a potential viral infection via the aforementioned dsRNA-  
113 sensing pathways. Activation leads not only to apoptosis of the target cancer cell but also  
114 stimulation of the immune system (via activation of NF- $\kappa$ B or interferon regulatory  
115 factors) and subsequent production of inflammatory cytokines. Apoptosis and immune  
116 activation represent two independent therapeutic pathways induced by distinct yet  
117 slightly overlapping dsRNA-sensing pathways providing a potential means to subvert  
118 evolutionarily-driven cancer resistance. In addition, by producing a long dsRNA in the  
119 presence of a unique cancer marker, the ORAD scheme functionally decouples  
120 recognition from therapy by eliciting a therapeutic affect that is independent of the cancer  
121 marker being targeted. This permits the targeting of virtually any uniquely transcribed  
122 cancer mRNA with a known sequence.

123 As a starting cancer model, we have chosen Ewings Sarcoma, an extremely  
124 malignant tumor of the bone and soft tissue with an extensively studied fusion gene.  
125 Sequences with closer homology to their wildtype counterpart, such as small nucleotide  
126 polymorphisms (SNPs), are more difficult to distinguish using ORAD due to the  
127 marginal thermodynamic difference between the intended target and wildtype. Cancerous  
128 fusion genes and their functional transcripts however, contain a very distinct nucleotide  
129 sequence around the fusion site, representing an ideal starting point to test ORAD due to  
130 the large thermodynamic difference between the intended target and wildtype.  
131 Approximately 90% of Ewing sarcoma cases contain a t(11;22)(q24;q12) chromosomal  
132 translocation resulting in the fusion of the EWS gene on chromosome 22 with the FLI1  
133 gene on chromosome 11 (25). The EWS/FLI1 fusion gene produces a functional mRNA

134 transcript that is ultimately translated into the EWS/FLI1 oncogenic fusion protein. Proof  
135 of concept tests on the A-673 human Ewing Sarcoma cell line, which expresses the  
136 EWS/Flil1 fusion transcript, and corresponding WPMY-1 wildtype cells using ORAD,  
137 reveal the potency and selectivity of the system and its potential as an all-encompassing  
138 cancer therapeutic (26).

139

## 140 **Methods**

### 141 **RNA Synthesis**

142 RNA were transcribed using the HiScribe T7 high yield RNA synthesis kit (New  
143 England Biolabs) according to manufacturer's instructions. To prevent the formation of  
144 aberrant dsRNA products during T7 RNA transcription, the concentration of MgCl<sub>2</sub> was  
145 limited to 6 mM (27). 100 ng of DNA gBlock (Integrated DNA Technologies) containing  
146 the T7 promoter was used as template and transcribed for 48 hours at 37°C. The post-  
147 transcription reaction mixture was incubated with 10 units of DNase I (New England  
148 Biolabs) at 37°C for 1 hour to remove the gblock template then purified using a RNA  
149 spin column (Zymo Research). Purified RNA was then treated with 200 units of calf  
150 intestinal phosphatase (New England Biolabs) at 37°C for 24 hours to ensure complete  
151 removal of any 5'-triphosphate moieties then purified again using a RNA spin column  
152 (Zymo Research). Lastly, RNA yields were determined using a Qubit 3.0 fluorometer  
153 (Invitrogen).

154 For modified RNA synthesis, including 2-thiouridine (s2U), 4-thiouridine (s4U),  
155 GU wobble, and 5-methylcytidine (5-mCTP), the natural base was replaced with its  
156 modified counterpart at equimolar concentrations and synthesized as described above.

157 Targeting RNA strands end-blocked with phosphorothioate bonds were chemically  
158 synthesized by Integrated DNA Technologies (IDT). 2'-fluoro (2'-F) modified RNA was  
159 synthesized using the DuraScribe T7 transcription kit (Lucigen) as described in the  
160 manufacturer's protocol. A list of all sequences and primers used can be found in  
161 Supplementary Table 1.

162

### 163 **DNA Synthesis and RNA Protection Protocol**

164 DNA was synthesized using standard Taq polymerase (New England Biolabs).  
165 For 2'-U scrambled DNA synthesis, a reverse primer only approach was utilized: 5 uL  
166 10x Taq buffer, 1 uL each of 10 mM dNTP (or 2'-U), 1 uL of 100 uM reverse primer  
167 only, 2 uL of 50 mM MgCl<sub>2</sub>, 1 uL of 10 ng/uL DNA template, 1 uL of Taq DNA  
168 polymerase, and 36 uL of H<sub>2</sub>O (50 uL total). The reaction mixture was then run through  
169 the following PCR protocol on the T100 Thermal Cycler (Bio-Rad): 1) denature at 95°C  
170 for 3 min, 2) denature at 95°C for 45 seconds, anneal at 55°C for 30 seconds, extend at  
171 72°C for 1 min 30 seconds, 5) repeat steps 2 - 4 30 times, 6) final extension at 72°C for  
172 10 min. Samples were then purified using a DNA spin column (Zymo Research) and  
173 quantified using a NanoDrop apparatus (ThermoFisher Scientific). DNA protector strands  
174 containing 2'-O methyl modifications were chemically synthesized by Integrated DNA  
175 Technologies (IDT).

176 For high yield synthesis of 2'-U EWS/Fli1 DNA, the following modified Taq  
177 protocol was utilized with both forward and reverse primer: 5 uL 10x Taq buffer, 1 uL  
178 each of 10 mM dNTP (or 2'-U), 1 uL of 100 uM 5' monophosphate-modified forward  
179 primer, 1 uL of 100 uM 5' phosphorothioate-modified reverse primer, 2 uL of 50 mM



180 MgCl<sub>2</sub>, 1 uL of 1 ng/uL DNA template, 1 uL of Taq DNA polymerase, and 35 uL of H<sub>2</sub>O  
181 (50 uL total). The reaction mixture was then run through the same thermocycling  
182 protocol listed above. Synthesized product was subsequently purified using a DNA spin  
183 column then digested using lambda exonuclease (New England Biolabs): 10 uL 10x  
184 lambda exonuclease buffer, 10 uL lambda exonuclease (50 units), 12 uL dsDNA  
185 template, and 68 uL H<sub>2</sub>O (100 uL total) at 37°C overnight. Lambda exonuclease  
186 digestion is required to isolate the desired antisense DNA protector from a dsDNA PCR  
187 product. Because lambda exonuclease preferentially digests DNA with a 5'-  
188 monophosphate, the forward primer, designed to elongate the non-desired sense DNA  
189 strand, is modified with a 5'-monophosphate instead of 5'-hydroxyl. In addition, the  
190 reverse primer, designed to elongate the desired anti-sense DNA strand, is modified with  
191 six phosphorothioate bonds on the 5' end to inhibit exonuclease digestion (28). Following  
192 lambda exonuclease treatment, strands were purified using a DNA spin column then  
193 quantified using a NanoDrop apparatus.

194 To duplex and protect the targeting RNA strands, 0.15 ug/uL of DNA protector  
195 and 0.1 ug/uL of targeting RNA (1:1.5 ratio) were thermally annealed in 1x PBS using  
196 the T100 thermal cycler based on the following protocol: samples were initially heated to  
197 95°C for 5 minutes, then uniformly cooled to 20°C over the course of 1 hour. For  
198 experiments testing and characterizing the 2'-U protected end-blocked targeting RNA  
199 (Figure 5), 0.1 ug/uL of RNA was annealed with 0.1 ug/uL of DNA (1:1 ratio) to remove  
200 any excess, non-duplexed DNA protector.

201

202 **Cell Viability & Cytokine Studies**

203 A-673 and WPMY-1 cells were obtained from ATCC (American Type Culture  
204 Collection; Manassas, Virginia) and maintained in Dulbecco's Modified Eagle Medium  
205 (DMEM) supplemented with 10% Fetal Bovine Serum (FBS) and 1%  
206 penicillin/streptomycin. Both cells were grown at 37°C in 5% CO<sub>2</sub>. For plating, cells  
207 were trypsinized from their flasks and quantified manually using a bright-line  
208 hemocytometer (Sigma-Aldrich; St. Louis, Missouri). Replicates of each dilution were  
209 then plated on either a 48- or 24-well Corning Costar flat bottom cell culture plate  
210 (Thermo Fisher Scientific; Waltham, Massachusetts) at either 1 x 10<sup>4</sup> cells/well or 5 x 10<sup>5</sup>  
211 cells/well respectively and grown overnight. Cells were then transfected with nucleic acid  
212 (RNA and/or DNA) using Lipofectamine RNAiMax (Life Technologies) at a ratio of 0.3  
213 ug nucleic acid / 1 uL Lipofectamine. The total amount of nucleic acid added to each  
214 experimental well was 3.15 ug of RNA and/or DNA / 50,000 cells, requiring  
215 approximately 10.5 uL of Lipofectamine RNAiMax to effectively deliver this dose.  
216 Experiments testing the chemically synthesized 120 bp targeting RNA required double  
217 the nucleic acid / Lipofectamine dose to induce an appropriate response (a detailed  
218 discussion of ORAD dosing can be found in the Supplementary Text). After a 48 hour  
219 incubation, cells were stained with 4',6-diamidino-2-phenylindole (DAPI) and quantified  
220 using microscopic cytometry as described previously (29). For cytokine studies,  
221 supernatant was extracted from the cell plates just prior to cell staining then processed  
222 and measured using a human IFN-β ELISA kit (PBL Assay Science).

223 For extended transfection studies, cells were plated onto 24-well cell culture  
224 plates at 5 x 10<sup>5</sup> cells/well then allowed to adhere overnight. Cells were transfected as  
225 described above then given 48 hours to incubate after which the media was replaced with

226 fresh media with one phosphate buffered saline (PBS) wash in between. Cells were  
227 transfected once again and given another 48 hours to incubate after which cell viability  
228 was assessed.

229

### 230 **Western Blot**

231 A-673 cells were plated onto a 6-well cell culture plate at  $5 \times 10^6$  cells/well then  
232 allowed to adhere overnight. Cells were transfected as described above then given 24  
233 hours to incubate. Following incubation, cells were lysed with RIPA buffer (Santa Cruz)  
234 as described in the manufacturer's instructions then centrifuged at 10,000g for 10 minutes  
235 to remove cell debris. Protein concentrations were calculated using a bicinchoninic acid  
236 (BCA) protein assay (Pierce) according to the manufacturer's instructions. Cell lysates  
237 (20 ug) were diluted in 4x LDS buffer (Life Technologies) with 5% Beta-  
238 mercaptoethanol. Samples were denatured by heating to 95°C for 5 minutes and cooled to  
239 room temperature. Proteins were resolved by SDS-PAGE on 4-12% gradient gels  
240 (Invitrogen) using MOPS running buffer (Life Technologies), and transferred to  
241 polyvinylidene fluoride (PVDF) membranes. Membranes were blocked for one hour at 40  
242 RPM on shaking platform with a 2:1 ratio of Odyssey Blocking Solution (Li-Cor) to PBS  
243 with 0.05% Tween-20 (PBS-T). Anti-pPKR T446 (Abcam, ab32036) and anti- $\beta$  tubulin  
244 (Developmental Studies Hybridoma Bank, E7) primary antibodies were diluted 1:1000 in  
245 a solution of PBS-T with 0.1% Bovine Serum Albumin (BSA). Primary antibodies were  
246 then detected using goat anti-rabbit 680 nm (Rockland Immunochemical,  
247 RL6111440020.5) and goat anti-mouse 800 nm secondary antibodies (Rockland

248 Immunochemical, RL6111450020.5) respectively after incubating in PBS-T + 0.1% BSA  
249 for two hours. Membranes were imaged on an Odyssey Classic Imager (Li-Cor).

250

### 251 **Cell Lysate Extraction**

252 Cultured cells were brought into suspension using standard cell culture protocol,  
253 centrifuged at 250g for 5 minutes to form a cell pellet, then washed once with PBS. Cells  
254 were subsequently resuspended in cell lysis buffer (920  $\mu$ L H<sub>2</sub>O, 50  $\mu$ L 1M Tris-HCl pH  
255 7.4, 10  $\mu$ L 10% sodium dodecyl sulfate, 10  $\mu$ L Igepal CA-630, 8.77 mg NaCl, 5 mg  
256 sodium deoxycholate, and 10  $\mu$ L protease inhibitor cocktail) at a ratio of 1 mL cell lysis  
257 buffer per 10<sup>6</sup> cells then incubated for 15 minutes on an orbital shaker. Lysed cells were  
258 centrifuged at 12,000g for 10 minutes. The remaining supernatant is the cell lysate.

259

### 260 **RNA Extraction and RT-qPCR**

261 Cell lysate was extracted, after incubating cells for 24 hours in condition, using  
262 the cell lysate extraction protocol listed above. Cell lysate was purified using a RNA spin  
263 column then treated with uracil-DNA glycosylase (5  $\mu$ L UDG, 5  $\mu$ L of 10x UDG  
264 reaction buffer, 25  $\mu$ L purified cell lysate, and 15  $\mu$ L of H<sub>2</sub>O) (New England Biolabs) for  
265 1 hour at 37°C followed by DNase I (10  $\mu$ L DNase I, 10  $\mu$ L of 10x DNase I buffer, 50  $\mu$ L  
266 UDG-treated cell lysate, and 30  $\mu$ L of H<sub>2</sub>O) for 1 hour at 37°C. Following UDG and  
267 DNase I incubation, samples were purified again using an RNA spin column.

268 After digesting 2'-U and genomic DNA, RNA levels were quantified using either  
269 a conventional 1-step RT-qPCR or a modified 2-step RT-qPCR protocol, both using the  
270 iTaq universal SYBR green one-step kit (BioRad). For 1-step RT-qPCR, the following

271 reaction components were mixed together: 5 uL of 2x iTaq universal SYBR green  
272 reaction mix, 0.125 uL iScript reverse transcriptase, 0.5 uL of 10 uM forward and reverse  
273 primer, 1 uL cell lysate, and 2.875 uL H<sub>2</sub>O. The RT-qPCR samples were then measured  
274 using the CFX96 Touch Real-Time PCR Detection System (BioRad) using the following  
275 thermocycling protocol: 1) reverse transcribe at 50°C for 10 minutes, 2) denature DNA  
276 and activate Taq polymerase at 95°C for 1 minute, 3) denature DNA at 95°C for 10  
277 seconds, 4) anneal and extend at 62°C for 20 seconds followed by fluorescence capture,  
278 and 5) repeat steps 3 – 4 35 times.

279

### 280 **Assessing RNA Stability in Cell Lysate and RNase H Displacement Assay**

281 For assessing RNA stability in cell lysate, 2.5 uL of 0.1 ug/uL protected or  
282 unprotected targeting RNA was incubated in 2.5 uL of cell lysate at 37°C for 48 hours.  
283 The digested samples were then mixed 1:1 (v/v) with formamide (Sigma-Aldrich) and  
284 run on a denaturing PAGE-Urea gel (ThermoFisher Scientific) in 1x TBE buffer at 60°C.

285 For RNase H displacement assays, 1 uL of 0.05 ug/uL DNA protected  
286 fluorescently-labeled targeting RNA was incubated with 1 uL of 0.1 ug/uL 400 bp EWS  
287 or Fli1 RNA in 1x PBS and incubated at 37°C for 48 hours. Following incubation, the  
288 samples were digested using RNase H in the following reaction mixture at 37°C for 20  
289 minutes: 2 uL sample, 0.5 uL 10x RNase H reaction buffer, 0.5 uL RNase H, and 2 uL  
290 H<sub>2</sub>O. The digested samples were then mixed 1:1 (v/v) with formamide and run on a  
291 denaturing PAGE-Urea gel in 1x TBE buffer at 60°C.

292

### 293 **Statistics**

294 All statistical analyses were performed using GraphPad Prism 8 Software.  
295 Significance was set at  $\alpha = 0.05$ . Comparisons between groups were assessed using one-  
296 way ANOVA.

297

## 298 **Results**

### 299 **Determining the Cytotoxic and Immunogenic Potential of the ORAD System**

300 It has been shown that dsRNA-binding proteins, like PKR, respond synergistically  
301 to multimer binding, with longer strands likely producing a stronger response (12).  
302 Preliminary tests suggest that *in vitro* transcribed (Fig S1) EWS/Fli1 antisense targeting  
303 RNA strands 200 bp in size, with 100 bp of the targeting RNA strand complementary to  
304 the EWS portion of the EWS/Fli1 fusion mRNA and the other 100 bp complementary to  
305 the Fli1 portion, were the most potent out of a range of targeting RNA varying in length  
306 from 20 bp to 390 bp (Fig S2). These 200 bp EWS/Fli1 targeting RNA were delivered  
307 into A-673 cells in the absence of a DNA protector to assess their cytotoxic potential (Fig  
308 2a). They were also tested against a reference *in vitro* transcribed 400 bp RNA sense  
309 strand, which is a truncated mimic of the EWS/Fli1 mRNA transcript, as well as two  
310 established positive controls: 5'-triphosphate and poly(I:C). The 200 bp targeting RNA is  
311 shown to be extremely potent, inducing a greater than 80% reduction in cell viability,  
312 while the reference 400 bp RNA sense strand is non-toxic. At this targeting RNA length,  
313 we can expect PKR, RIG-I, and OAS to be active but not MDA5, which tends to activate  
314 in the presence of significantly longer dsRNA, typically kilobases or larger (30-32).

315 IFN $\beta$  production was then assessed using supernatant from the treated wells (Fig  
316 2b). IFN $\beta$  is a type I interferon that serves an important role in cancer immunotherapy

317 and is a relatively sensitive marker of dsRNA pathway activation. In general, IFN $\beta$   
318 induction levels closely mirror cytotoxic trends. To see if the ~10-20% of cells that  
319 survived initial treatment were resistant to the ORAD system, we treated A-673 cells  
320 either once or twice with therapeutic RNA spaced by the appropriate incubation period  
321 (Fig S3). After 48 hours, A-673 cell viability had been reduced by ~90%, however a  
322 repeat administration and additional 48 hour incubation reduces cell viability by another  
323 95%, representing a greater than two-order of magnitude drop in overall cell viability.  
324 These results not only indicate the extreme potency of the ORAD system, but also imply  
325 that those cells that survive initial treatment have not developed resistance to the  
326 therapeutic RNA. To confirm dsRNA-specific pathway activation, PKR  
327 autophosphorylation was measured via western blot revealing a robust and specific  
328 induction pattern in the presence of 200 bp EWS/Fli1 targeting RNA versus 400 bp  
329 EWS/Fli1 mimic (i.e. sense) RNA (Fig 2c). Altogether, data measuring cell viability,  
330 IFN $\beta$  expression, and PKR activation suggest that the generation of a long dsRNA  
331 product is indeed producing the robust response being observed.

332         Having validated the cytotoxic potential of the ORAD system, we ran strand  
333 displacement simulations of the 200 bp EWS/Fli1 targeting RNA now sealed with a DNA  
334 protector. Secondary structure analysis revealed that initial variants of the 200 bp  
335 targeting RNA/DNA, with the fusion-site located directly in the middle of the strand (100  
336 bp complementary to EWS and Fli1 each), were forming trimeric states with homologous  
337 wildtype sequences. To prevent this, the targeting fusion site was shifted towards the 3'  
338 end of the targeting RNA in order to kinetically lock the strands (Supplementary Text).  
339

## 340 **Modifying Protector Seal to Prevent Non-Specific Cytotoxicity**

341 Initial tests of the newly designed and synthesized EWS/Fli1 fusion-shifted  
342 targeting RNA strands in a wildtype WPMY-1 cell line demonstrated non-specific  
343 cytotoxicity when a DNA protector was utilized at a 1:1.5 targeting RNA to DNA  
344 protector ratio (data not shown). We hypothesized that the RNA/DNA hybrids of the  
345 ORAD system might function as a pathogen-associated molecular pattern (PAMP), and  
346 as a result induce non-specific immune activation. Accordingly, various modifications  
347 were tested on the protected RNA duplexes with the goal of rendering them fully inert.  
348 While modifying the targeting RNA could interfere with the therapeutic pathway of the  
349 ORAD system by altering binding to dsRNA-sensing proteins, adapting the protector seal  
350 would be far less restrictive. Thus, several modified deoxynucleotides, ribonucleotides,  
351 and altered Watson-Crick base pairs that could potentially replace canonical bases and  
352 base pairs in the protector were compared to determine which modifications could help  
353 the duplex evade detection by PAMP-receptors. These modified bases and altered base  
354 pairs include 2-thiouridine (s2U), 4-thiouridine (s4U), GU wobble, 5-methylcytidine (5-  
355 mCTP), 2'-deoxyuridine (2'-U), and 2'-O methyl (33-35).

356 To avoid potential confounding effects from the EWS/Fli1 targeting RNA, we  
357 synthesized a new 200 bp scrambled RNA strand, as well as corresponding modified  
358 RNA or DNA protectors, to isolate the protective effects of each modification. 2-  
359 thiouridine-, 5-methylcytidine-, and GU wobble 4-thiouridine-containing scrambled RNA  
360 protectors were synthesized using conventional RNA transcription, while 2'-U-  
361 containing scrambled DNA protectors were synthesized using a modified Taq PCR  
362 protocol. 2'-O methyl-containing DNA protectors cannot be enzymatically synthesized



363 using PCR so strands modified with ~10% 2'-O methyl-containing GTPs were  
364 chemically synthesized instead.

365 The newly synthesized scrambled duplexed strands were subsequently transfected  
366 into A-673 cells. We found that neither 2'-O methyl, s2U, 5-mCTP, or GU wobble with  
367 the s4U modification was sufficient to shut down non-specific cytotoxicity (Fig 3a).  
368 However, 2'-U modified DNA proved to be almost completely inert (Fig 3b), making it  
369 the ideal protector modification moving forward for the RNA/DNA scheme.

370 EWS/Fli1 targeting RNA, now protected with 2'-U modified DNA, were again tested  
371 in WPMY-1 control cells, however preliminary results indicated that the DNA seal failed  
372 to confer any protective benefit (data not shown).

373

#### 374 **Modifying Targeting RNA to Resist Degradation**

375 Two possibilities were considered regarding the failure of the new 2'-U protected  
376 targeting RNA: either the targeting RNA was degrading in the cell cytoplasm, which  
377 would break the protector's kinetic lock, leading to premature activation of the ORAD  
378 system, or the inclusion of the 2'-U moiety altered base-pairing thermodynamics in a way  
379 that ultimately reduced the strength of the protector seal.

380 We first focused on inhibiting RNA degradation in the cytoplasm, via endo- and  
381 exo-nucleases, while minimizing alterations to the targeting RNA that could potentially  
382 reduce therapeutic efficacy (36,37). Two candidate modifications were found that could  
383 potentially be used to inhibit RNA degradation: 2'-fluorination and phosphorothioate-  
384 backbone incorporation (28,38). Because endonucleases canonically cut at purine base  
385 residues, 2'-fluorine modifications at these sites should inhibit not only exonucleases but

386 also endonucleases, even in the absence of a protector (38). We hypothesized that end-  
387 blocking RNA with phosphorothioate (PS) bonds would inhibit exonucleases, while  
388 adding a DNA protector would protect against endonucleases, in the latter case, by  
389 forming a double-stranded nucleic acid complex (28). The addition of DNA bases to the  
390 end of the targeting RNA strand should accentuate any protective benefit the PS bonds  
391 may confer. 2'-fluorinated RNA was synthesized using the Y639F mutant T7 RNA  
392 polymerase, which is able to incorporate non-canonical bases like 2'-F (39). PS-bonds  
393 cannot be incorporated using conventional transcription, so end-blocked PS strands were  
394 chemically synthesized.

395 To test the resistance of the modified strands to degradation, 200 bp unmodified  
396 RNA, 200 bp fluorinated RNA, or chemically synthesized, shortened (30 bp test size),  
397 end-blocked RNA were incubated in WPMY-1 cell lysate for 48 hours. After incubation,  
398 strands were run on a denaturing PAGE-Urea gel and stained with SYBR gold (Fig 4a).  
399 The RNA strands alone are stable in 1x PBS over 48 hours, but almost entirely break  
400 down in the presence of cell lysate, with the exception of fluorinated RNA. As expected,  
401 in its protected state, the end-blocked RNA is also resistant to degradation. DNase was  
402 used to remove the overlapping signal from the DNA protector, revealing the fluorinated  
403 RNA underneath, and further showing that DNA protection alone is insufficient to  
404 protect unmodified RNA in cell lysate. It should be noted that the chemically  
405 synthesized, 30 bp test size, end-blocked RNA is no longer visible post-DNase digestion  
406 because the ends of the end-blocked RNA contain DNA, which when degraded in the  
407 presence of DNase, causes the RNA band to shift downwards and off the gel.

408           After running preliminary cytotoxicity tests in cells, the 2'-F RNA we synthesized  
409           was found to be too nonspecifically toxic (data not shown) and was not pursued further,  
410           leaving the end-blocked RNA as the primary candidate moving forward. By design, the  
411           end-blocked RNA contains two to three PS bonds at either end, along with four to five  
412           overlapping DNA bases. Because PS-modified RNA strands need to be chemically  
413           synthesized using phosphoramidite solid phase synthetic processes, they can be made no  
414           longer than 120 bp with current technology (40).

415           Having addressed the degradation issue, we next sought to verify that the 2'-U  
416           protected end-blocked targeting RNA still followed thermodynamic simulations and  
417           bound only to the target EWS/Fli1 mRNA cancerous sequence and not the EWS or Fli1  
418           mRNA wildtype sequences. This was accomplished using an RNase H assay to gauge  
419           selective displacement (see Fig S4 for a schematic). RNase H is an endonuclease that  
420           cleaves the RNA strand in an RNA/DNA duplex. Because the DNA protector seal is  
421           supposed to remain bound to the targeting RNA in the presence of both wildtype  
422           sequences, the RNA/DNA duplex remains a substrate for RNase H, leading to targeting  
423           RNA degradation. However, in the presence of the target cancerous sequence, the DNA  
424           protector is displaced leading to the formation of a dsRNA complex, which is not an  
425           adequate substrate for RNase H. Accordingly, the targeting RNA remains intact and  
426           available for subsequent detection.

427           The protected end-blocked RNA were incubated in the presence of either the  
428           desired EWS/Fli1 target sequence or the EWS or Fli1 wildtype sequences for 48 hours in  
429           1x PBS then treated with RNase H (Fig 4b). Only EWS/Fli1 RNA is capable of  
430           displacing the DNA seal, indicated by resistance to RNase H digestion and corresponding

431 preservation of fluorescent signal. EWS and Fli1 wildtype are incapable of removing the  
432 DNA protector, leading to RNase H digestion and loss of signal. No difference in  
433 protector performance can be seen between the 2'-U and unmodified DNA protectors  
434 signifying that 2'-U modified bases do not have significantly altered base-pairing  
435 thermodynamics. Altogether, this suggests that RNA degradation in the cell cytoplasm,  
436 and breaking of the protector's kinetic lock, likely led to premature activation of the 2'-U  
437 DNA protected targeting RNA strands in the control WPMY-1 cells, and that this process  
438 can be inhibited by end-blocking the targeting RNA.

439

#### 440 **Testing and Characterizing 2'-U Protected End-Blocked Targeting RNA**

441 Observational data of early tests utilizing the 2'-U EWS/Fli1 DNA protector were  
442 surprising, in that the EWS/Fli1 2'-U DNA protector alone was found to induce  
443 cytotoxicity, which was not the case with the scrambled 2'-U DNA protector tested  
444 earlier. We realized that if 2'-U DNA mediated cytotoxicity was sequence specific, it is  
445 theoretically possible that the sense 2'-U DNA protector is getting transcribed in the  
446 cytoplasm into antisense targeting RNA, via an RNA polymerase. Recently, RNA  
447 polymerase III, which is typically thought to reside in the nucleus, was found localized in  
448 the cytoplasm functioning as a DNA sensor (41). When displaced from the RNA/DNA  
449 duplex by the target cancer mRNA sequence, the 2'-U DNA protector is potentially made  
450 available for transcription by RNA polymerase III leading to linear amplification of the  
451 targeting RNA strand and increased potency of the ORAD system (Fig 5a).

452 With the 2'-U DNA protector potentially more cytotoxic than the targeting RNA  
453 strand but partially uncomplexed as part of the initial RNA/DNA duplex ratio of 1:1.5, an

454 adjustment was made lowering the duplex ratio down to 1:1. Through these changes, the  
455 DNA protector of the ORAD system demonstrated intracellular specificity for the first  
456 time (Fig 5b). As expected, the 2'-U DNA protector alone was toxic in the A-673 and  
457 WPMY-1 cells, but when duplexed at a 1:1 ratio with targeting RNA, cell viability in  
458 WPMY-1 returned to near 100% with cytotoxicity still apparent in the A-673 cells.  
459 Perhaps most convincing is the complexing of the 2'-U DNA protector with a non-  
460 complementary sense RNA strand. The sense RNA strand cannot seal the 2'-U DNA  
461 protector, causing the cytotoxicity profile for this condition to closely mirror the 2'-U  
462 DNA protector alone condition. Supernatant from the treated wells were also extracted  
463 and tested for IFN- $\beta$  production. When the targeting strands are protected, IFN- $\beta$  is  
464 potently induced in the A-673 target cell line versus the control WPMY-1 cells (Fig S5).  
465 It should be noted that the cytotoxic potential of the ORAD system appears to have been  
466 reduced after shortening the size of the targeting RNA to 120 bp from 200 bp as well as  
467 end-blocking the RNA with both DNA bases and phosphorothioate bonds.

468         The previously reported data strongly supports the RNA polymerase III  
469 hypothesis, though not directly. In an attempt to mechanistically prove RNA polymerase  
470 III activity, we sought to detect and quantify the transcribed RNA product that the 2'-U  
471 DNA protector would generate in the presence of RNA polymerase III using RT-qPCR.  
472 In both A-673 and WPMY-1 cells, a weak but significant (greater than unity)  
473 transcribed 2'-U DNA signal was detected that exceeds both non-specific signal from  
474 control untreated cells as well as signal that originates from DNA, the latter of which  
475 was determined by running a no reverse transcriptase control (Fig 5c). In target A-

476 673 cells, this signal was approximately 9-fold higher than the corresponding control  
477 condition, and in WPMY-1 this signal was approximately 3.5-fold higher.

478

## 479 **Discussion**

480 The proof of concept ORAD system described herein represents a potentially new  
481 class of cancer therapeutics based on the principle of self-assembling dsRNA. The system  
482 is a potent inducer of both cytotoxicity and cytokine production and can selectively target  
483 cancerous cells that express unique fusion genes while sparing normal tissue. By  
484 producing a long dsRNA product in the presence of a unique cancer marker, the ORAD  
485 scheme functionally decouples recognition from therapy by eliciting a therapeutic effect  
486 that is independent of the cancer marker being targeted. This permits the targeting of  
487 virtually any uniquely transcribed cancer mRNA with a known sequence.

488 A similar approach has been attempted before using 40 bp antisense RNA strands  
489 designed to be complementary to fragments flanking the fusion site of an oncogene (42).  
490 When bound to the target oncogene but not wildtype mRNA, a dsRNA product sufficient  
491 in length to activate PKR is generated. One of the issues with this approach however is  
492 that the length of antisense RNA used must be restricted, which would likely reduce  
493 potency. Furthermore, the antisense RNA needs to be constitutively expressed at high  
494 levels using a transfected plasmid (42). Another method using RNA hairpin displacement  
495 has been attempted, but met with limited success (43). RNA hairpins are generally less  
496 stable and consistent than the protected probe scheme listed here, often leading to  
497 increased nonspecific activation and off-target effects (11). Lastly, use of preformed  
498 dsRNA or poly(I:C), especially as an immune adjuvant in clinical trials, has become

499 increasingly popular. However, targeting and specificity require the expression of unique  
500 extracellular antigens that homing vectors can target (44,45). It is possible that either  
501 these unique antigens are not be available for targeting, are also expressed on healthy  
502 cells, or are downregulated as a form of evolutionary resistance, limiting the potential use  
503 of this form of therapy. By virtue of its design, the ORAD system overcomes many of the  
504 aforementioned issues.

505 We show that *in vitro* transcribed targeting RNA strands 200 bp in length can  
506 reduce cell viability by up to 90% in cells that express a target cancer fusion mRNA  
507 sequence while an equivalent dose of unprotected 400 bp EWS/Fli1 mimic (sense) RNA,  
508 intended to serve as a negative control, is minimally toxic. This suggests that the potent  
509 response induced by the 200 bp EWS/Fli1 is in part governed by sequence specificity and  
510 not the result of off-target binding. In addition, the 200 bp ORAD targeting RNA was  
511 more cytotoxic than both 5'-triphosphate RNA and poly(I:C) which are strong inducers  
512 of RIG-I and PKR (14,46). Supernatant extracted from treated wells show that IFN $\beta$   
513 induction levels closely mirror cytotoxic trends with the exception of pre-complexed  
514 200 bp EWS/Fli1 targeting RNA + 400 bp mimic RNA, which produced lower levels  
515 of IFN $\beta$  than expected. This is likely the result of the overwhelming cytotoxicity of  
516 the pre-complexed dsRNA hindering the production of IFN $\beta$ . Selective PKR activation  
517 in the presence of 200 bp targeting RNA was observed via detection of phosphorylated  
518 PKR protein, while 400 bp mimic RNA showed only slight non-specific activation, most  
519 likely via the formation of minimal, non-contiguous intramolecular dsRNA segments  
520 generated via secondary hairpin formation. Unfortunately, a robust method to detect other  
521 endogenously activated dsRNA-sensing proteins including RIG-I and OAS3 could not be

522 established in the current experimental framework. Altogether, the data indicate that the  
523 formation of a dsRNA product is indeed responsible for producing the pronounced  
524 response that is being observed.

525 Literature suggests that in the 100 – 200 bp size range, we can expect several  
526 dsRNA-sensing pathways, including PKR, RIG-I, OAS, and Dicer, to activate but not  
527 MDA5 (47). It is possible that targeted cytotoxicity may be even more pronounced at  
528 significantly longer targeting RNA lengths by recruiting additional dsRNA-sensing  
529 proteins. By activating multiple, somewhat redundant dsRNA-sensing pathways, that  
530 induce two distinct therapeutic pathways (apoptosis and immune activation), the ORAD  
531 system is potentially resilient to evolutionary resistance acquired either upstream or  
532 downstream of the recognition portion of the dsRNA signaling transduction cascade.  
533 Because cancerous mutations, especially driver mutations, are signatures of the cancerous  
534 phenotype and not easily downregulated, the ORAD system's recognition of unique  
535 cancer mRNA represents another means to prevent evolutionarily-driven cancer  
536 resistance (48). The ability to target multiple mutations at once only serves to strengthen  
537 this effect. This phenomenon is confirmed to an extent with the repeat transfection test  
538 that was conducted on cancer target cells that survived initial treatment. The initial 10%  
539 of cells that “evaded” ORAD-induced cytotoxicity were further reduced in number by  
540 approximately an order of magnitude upon repeat administration likely indicating that  
541 those cells that survive initial treatment have not developed resistance to the therapeutic  
542 RNA. With multiple dosing regimens, cytotoxicity could theoretically reach 100%.

543 In general, assessment of both cytotoxicity and cytokine production proved to be  
544 the most sensitive assays for testing the efficacy of the ORAD system during each stage



545 of the development process. A more robust assay to detect therapeutic activation,  
546 including western blot or use of a fluorescent reporter cell line, is not available to assess  
547 the multifaceted components of the ORAD system. Western blot, for example, is not  
548 sufficiently quantitative to detect the subtle intracellular response to each ORAD  
549 modification, while a fluorescent reporter cell line cannot take into the account the  
550 multiple dsRNA-sensing pathways that converge to induce apoptosis and immune  
551 activation. Altogether, these alternative assays are too narrow in focus to assess the  
552 cumulative response of each ORAD-induced pathway.

553         After demonstrating the success of long dsRNA in inducing cytotoxicity and  
554 activating the innate immune system, thus confirming the *therapeutic* arm of the ORAD  
555 system, we focused on engineering DNA protectors that would confer specificity to the  
556 targeting RNA strands in order to validate the *diagnostic* arm of the ORAD system. To  
557 maintain selectivity and prevent trimer formation, the ORAD RNA/DNA hybrids were  
558 modified so that the targeting RNA fusion-site was shifted towards the 3' end of the  
559 strand, kinetically locking the system. For specificity studies, the WPMY-1 cell line was  
560 chosen as a control comparator given its origin from histologically normal tissue (albeit  
561 immortalized) and closer resemblance to actual wildtype cells encountered in the human  
562 body (49). This cell line was chosen in place of siRNA or gene knockdown of EWS/Fli1  
563 mRNA in A-673 cells, as these methods significantly alter the transcriptome and  
564 proliferative potential of the cell, likely because the EWS/Fli1 fusion protein is in part  
565 responsible for driving the cancerous phenotype in Ewing Sarcoma (50).

566         After running cytotoxicity studies of the newly designed and synthesized  
567 EWS/Fli1 fusion-shifted targeting RNA strands in control WPMY-1 cells, the DNA

568 protected targeting RNA complexes were found to be non-specifically cytotoxic. We  
569 realized that the RNA/DNA hybrids of the ORAD system might function as a PAMP. In  
570 response to the very long cytoplasmic RNA/DNA duplexes that were exogenously being  
571 introduced into the cell, inflammasomes, including the NLRP3 inflammasome, might be  
572 triggering and inducing non-specific cytotoxicity. The NLRP3 inflammasome has been  
573 shown to recognize RNA/DNA hybrids of bacterial origin that have gained access to the  
574 cytoplasm. Upon recognition and activation, NLRP3 inflammasomes induce the  
575 production of IL-1 $\beta$ , maturation of IL-18, and stimulation of a form of inflammatory cell  
576 death known as pyroptosis (51,52). To render the RNA/DNA duplexes inert, various  
577 modifications to the protector were tested, including the incorporation of 2-thiouridine  
578 (s2U), 4-thiouridine (s4U), GU wobble, 5-methylcytidine (5-mCTP), 2'-deoxyuridine  
579 (2'-U), and 2'-O methyl. Only insertion of 2'-U modifications into the DNA protector  
580 rendered scrambled RNA/DNA duplexes non-toxic in A-673 cells. 2'-deoxyuridine is  
581 unique in that it contains structural components from both RNA and DNA. While 2'-U  
582 has a DNA sugar lacking a 2'-hydroxyl, it contains an RNA uracil base. Though  
583 induction and subsequent resolution of PAMP activation was not directly assessed, 2'-U  
584 may create a hybrid structure that is not an adequate substrate for pathogen-detection  
585 systems in the cell including not only the NLRP3 inflammasome but also traditional  
586 dsRNA-sensing pathways. Future studies investigating the specific components of the  
587 PAMP activation pathway, such as the NLRP3 inflammasome, will help elucidate their  
588 various contributions to cell viability and immunogenicity in the setting of the ORAD  
589 system. Ultimately, the ability of 2'-U to render the ORAD complexes inert makes it the  
590 ideal candidate moving forward for the RNA/DNA scheme (53).

591           After testing fusion-shifted EWS/Fli1 targeting RNA protected with newly  
592 synthesized 2'-U modified DNA in WPMY-1 cells, we found that the DNA seal failed to  
593 confer any protective benefit. We speculated that either the targeting RNA was degrading  
594 in the cell cytoplasm, which would break the protector's kinetic lock, or that inclusion of  
595 the 2'-U moiety was reducing the strength of the DNA protector seal. We focused first on  
596 inhibiting RNA degradation using either 2'-fluorination or phosphorothioate-backbone  
597 incorporation. After synthesizing the appropriate strands, unmodified, fluorinated and  
598 end-blocked phosphorothioate modified RNA were incubated in cell lysate for 48 hours  
599 and run on a denaturing PAGE-Urea gel. Unmodified RNA was susceptible to  
600 degradation regardless of whether it was duplexed with a DNA protector while 2'-F was  
601 resilient to degradation with or without a protector seal. The end-blocked  
602 phosphorothioate modified RNA was only resistant to degradation when duplexed to the  
603 DNA protector confirming the dominant role of exonucleases in degrading and  
604 potentially prematurely activating strands of the ORAD system.

605           Because 2'-F RNA was found to be too nonspecifically toxic, we were left with  
606 end-blocked, PS-modified RNA as the primary candidate for protecting the targeting  
607 RNA of the ORAD system. By design, the end-blocked RNA contains two to three PS  
608 bonds at either end, along with four to five overlapping DNA bases. Phosphorothioate  
609 bonds substitute a sulfur atom for a non-bridging oxygen in the phosphate backbone of an  
610 oligonucleotide strand. This renders the inter-nucleotide linkage resistant to nuclease  
611 degradation. However, the number of PS bonds that can be incorporated into a strand is  
612 limited due to nonspecific toxicity of the bonds (28). An additional limitation is that these

613 strands need to be chemically synthesized limiting the size of the targeting RNA to no  
614 more than 120 bp.

615 Selective displacement of the newly synthesized 2'-U DNA protected, 120 bp  
616 fusion-shifted, end-blocked targeting RNA was then tested using an RNase H assay.  
617 Incubating the strands in 1x PBS for 48 hours with truncated *in vitro* transcribed copies  
618 of the target EWS/Fli1 and wildtype EWS and Fli1 sequences confirms the specificity of  
619 the ORAD strands for the intended target, indicated by resistance to RNase H digestion  
620 and corresponding preservation of fluorescent signal with the EWS/Fli1 target sequence  
621 and loss of signal due to RNase H digestion in the presence of the EWS and Fli1 wildtype  
622 sequences. The complex band pattern observed between 120 bp and 400 bp in the  
623 presence of EWS/Fli1 is likely due to abnormal migration of the thermodynamically  
624 stable but partially double-stranded RNA complex (120 bp is duplexed fully while 280 bp  
625 is single-stranded). An extended discussion regarding the RNase H displacement assay  
626 can be found in the Supplementary Text.

627 Having modified the ORAD strands to prevent premature activation in the cell  
628 cytoplasm, we tested various combinations of the newly modified, end-blocked 120 bp  
629 synthetic EWS/Fli1 targeting RNA with a complementary 2'-U DNA protector to assess  
630 any effects alterations to the RNA would have on cytotoxicity. Interestingly, we noticed  
631 that the EWS/Fli1 2'-U DNA protector alone was inducing cytotoxicity, which was not  
632 the case with the scrambled 2'-U DNA protector used in Figure 3. We hypothesized that  
633 an additional enzyme—RNA polymerase III—may be contributing to the toxicity of the  
634 2'-U DNA by transcribing it in the cytoplasm into what is effectively targeting RNA.  
635 RNA polymerase III is typically thought to reside in the nucleus where it transcribes

636 rRNA, tRNA, and other small RNAs (54). However, recent literature suggests that RNA  
637 polymerase III is also localized in the cytoplasm where it functions as a DNA sensor,  
638 transcribing foreign DNA into RNA with a 5'-triphosphate, which can subsequently be  
639 detected by RIG-I. In particular, sequences rich in adenine and thymine base residues  
640 were found to be adequate substrates for RNA polymerase III in the cytoplasm (41).  
641 Though it's not clear how, 2'-U may function similarly.

642         Based on the proposed interaction between RNA polymerase III and the ORAD  
643 system depicted in Figure 5a, both the 2'-U DNA and targeting RNA can be viewed as  
644 primary therapeutic components with each serving as the protector for the other.  
645 Accordingly, the targeting RNA to DNA protector ratio was brought down from 1:1.5  
646 (DNA protector in 0.5x excess) to 1:1 (DNA protector present in equimolar amounts).  
647 For the original ratio, which had the 2'-U DNA protector in 50% excess of the targeting  
648 RNA, a small but non-trivial percent of 2'-U DNA was left un-complexed making it  
649 available for potential transcription.

650         With the 1:1 RNA to DNA ratio adjustment, we observed the resolution of non-  
651 specific cytotoxicity in WPMY-1 cells suggesting that the RNA and DNA strands of the  
652 ORAD system were now appropriately sealed and inert in control cells. The sequence  
653 specific effect of the protector complex was confirmed using a non-complementary sense  
654 RNA strand in conjunction with the 2'-U DNA protector, which together was inadequate  
655 to seal the duplex and prevent cytotoxicity. It should be noted that the cytotoxicity of the  
656 2'-U protected targeting RNA is slightly reduced in A-673 cells relative to the 2'-U DNA  
657 protector alone when it should theoretically remain unchanged. We suspect that the  
658 displacement reaction is not 100% complete in the target cell line and that further tuning

659 of the toehold regions may be required. In addition, the reduced length of the targeting  
660 RNA as well end-blocking with both PS bonds and DNA bases appear to have notably  
661 reduced overall cytotoxicity. While reducing the length of the targeting RNA can  
662 theoretically reduce the cytotoxic potential of the ORAD system by decreasing the  
663 number of dsRNA-binding monomers that can attach to the final targeting RNA complex,  
664 it is not clear why end-blocking the strands is also inhibitory. It is possible that certain  
665 dsRNA-sensing proteins are incapable of accessing the ORAD targeting RNA when end-  
666 blocked. Though crystal structures of PKR suggest that the protein is capable of binding  
667 dsRNA internally, helicases like RIG-I may need to initiate binding at the 5' or 3' ends of  
668 the strand (55-58). Although end-modification incorporation is currently necessary to  
669 prevent RNA degradation and chemical synthesis is required to insert these modifications  
670 thereby limiting the size of the targeting RNA, it may be possible in the near future to  
671 chemically synthesize longer strands, incorporate end-blocking modifications via *in vitro*  
672 transcription, or utilize a different set of end-blocking modifications that minimally alter  
673 the targeting RNA strand to preserve cytotoxicity at levels seen in Fig 2a, while  
674 simultaneously maintaining specificity.

675 In an attempt to mechanistically prove the RNA polymerase III mechanism, RT-  
676 qPCR was used to detect and quantify the transcribed RNA product that the 2'-U DNA  
677 protector would generate in the presence of RNA polymerase III. After running total  
678 RNA extraction on A-673 and WPMY-1 cells treated with and without EWS/Fli1 2'-U  
679 DNA protector, incubating the extract with Uracil-DNA Glycosylase to remove 2'-U  
680 DNA as well as DNase to remove genomic DNA, and running gene specific primer RT-  
681 qPCR, we detected a trace (greater than unity) but unique RNA signal in cells treated

682 with the 2'-U DNA protector versus untreated control cells. The transcribed RNA signal  
683 was also stronger than any signal originating from DNA, which was determined by  
684 running a no reverse transcriptase control. To ensure that the signal enhancement seen in  
685 the 2'-U DNA protector condition versus untreated control was not the result of changes  
686 in Fli1 expression levels, a modified 2-step RT-qPCR was performed confirming the  
687 identity of the amplified product as the RNA transcribed 2'-U DNA (Supplementary  
688 Text).

689 The aforementioned data strongly supports the RNA polymerase III hypothesis,  
690 albeit indirectly. If the proposed interaction of the ORAD system with RNA polymerase  
691 III is indeed true, it would raise the cytotoxic potential of the system considerably due to  
692 the linear amplification of therapeutic agent. In addition, even though RNA polymerase  
693 III potentially enhances the cytotoxicity of the system, it is not essential. For cancerous  
694 cells that do not express RNA polymerase III or have it knocked down as a form of  
695 evolutionary resistance, the primary targeting RNA strand is still present to enact the  
696 original design of the system. More studies are required to verify the RNA polymerase III  
697 hypothesis or determine possible alternative mechanisms by which 2'-U DNA is  
698 transcribed intracellularly. Additional work is also necessary to establish the precise role  
699 of chemical modifications and sequence of the DNA protector in the transcription  
700 potential of exogenous ORAD DNA in the cytoplasm. Further exploration of the  
701 proposed 2'-U mechanism may elucidate novel therapeutic targets or future avenues for  
702 cancer treatment.

703

704 **Conclusions**

705           ORAD represents a proof of concept system to induce specific and potent killing  
706 of cells containing a target oncogenic sequence but not wildtype, decouple recognition  
707 from treatment, and overcome evolutionarily driven cancer resistance. With further  
708 advances in RNA synthesis methodology including, but not limited to, chemical synthesis  
709 of longer strands or ability to incorporate end-blocking modifications via *in vitro*  
710 transcription, ORAD treatment with longer 2'-U DNA protected targeting RNA and an  
711 appropriate delivery vehicle has the potential to induce a robust response *in vivo* and one  
712 day improve progression-free and/or overall survival in the setting of a clinical trial. In  
713 theory, the targeting strands of the ORAD system only need to be administered once as  
714 immune surveillance and memory can suppress tumor recurrence and metastasis.  
715 However if a tumor were to recur, this form of personalized medicine can be repeated as  
716 long as a biopsy and genomic sequence is attainable (59). The ability to potentially target  
717 any cancer type is also strongly compelling. We hope our self-assembling dsRNA cancer  
718 therapeutics will one day improve the survival and quality of life for cancer patients, and  
719 introduce a paradigm shift in how we view and treat cancer, by placing a special  
720 emphasis on what makes cancer fundamentally unique—genetics.

721

## 722 **Funding**

723 This work was supported in part by the Cancer Prevention and Research Institute of  
724 Texas (RR140081 to G.B.).

725

## 726 **Competing Interests**

727 The authors declare that they have no competing interests.



728

## 729 **Acknowledgements**

730 We would like to thank the Miller lab for providing the Nikon Eclipse Ti-E inverted  
731 fluorescent microscope, the Zhang lab for providing feedback on the DNA protected  
732 RNA designs of the ORAD system, and the Drezek lab for editorial assistance. We would  
733 also like to thank the Baylor College of Medicine Medical Scientist Training Program  
734 (MSTP) for providing training support throughout the duration of the project.

735

## 736 **Figure Captions**

737 **Figure 1. Oncogenic RNA activated displacement (ORAD) schematic.** The ORAD  
738 system is composed of a targeting RNA strand and a complementary DNA protector.  
739 When the RNA/DNA duplex encounters a wildtype strand with insufficient  
740 complementarity, the DNA protector fails to release, leading to no response. However,  
741 when the targeted cancerous sequence is encountered, the cancerous mRNA is able to  
742 dislodge the DNA protector via strand displacement, producing a therapeutic dsRNA  
743 product leading to apoptosis and cytokine production. Arrowheads signify 3' ends.  
744 Asterisks signify complementarity.

745

746 **Figure 2. Assessing the cytotoxic and immunogenic potential of the ORAD system.**  
747 [A] Cytotoxicity and [B] IFN $\beta$  cytokine induction levels of 200 bp EWS/Fli1 targeting  
748 RNA were compared with levels generated by a reference 400 bp EWS/Fli1 sense RNA  
749 strand as well as two established positive controls: poly(I:C) and 5'-triphosphate in A-  
750 673 cells. [C] Activation and subsequent phosphorylation of the dsRNA-sensing protein  
751 PKR was measured in the presence of lipofectamine (L), 400 bp EWS/Fli1 mimic (i.e.  
752 sense) RNA (M), or 200 bp EWS/Fli1 targeting RNA (T), using western blot. Error bars  
753 represent the standard deviation of replicate conditions.

754

755 **Figure 3. Chemically modifying protector complexes to prevent non-specific**  
756 **cytotoxicity.** Scrambled 200 bp targeting RNA strands were protected with either  
757 modified [A] RNA or [B] DNA protectors and transfected into A-673 cells using  
758 lipofectamine. Only scrambled targeting RNA protected with 2'-U modified DNA were  
759 rendered inert and non-toxic. s2U = 2-thiouridine, 5-mCTP = 5-methylcytidine, s4U = 4-  
760 thiouridine, 2'-U = 2'-deoxyuridine. Error bars represent the standard deviation of  
761 replicate conditions (\* =  $p < 0.05$ , \*\* =  $p < 0.005$ , ns = non-significant).

762

763 **Figure 4. Modifying targeting RNA to resist endo/exonucleolytic degradation and**  
764 **assessing selective displacement extracellularly.** [A] 200 bp unmodified (UM), 30 bp  
765 chemically synthesized test size end-blocked (EB), and 200 bp 2'-fluorinated (F)

766 EWS/Fli1 targeting RNA were incubated alone or protected with DNA (P) in either 1x  
767 PBS or WPMY-1 cell lysate for 48 hours. Post-incubation, select samples were digested  
768 with DNase to remove overlapping signal from the DNA protector. All conditions were  
769 then run on a denaturing PAGE-Urea gel and visualized using SYBR Gold. The presence  
770 of a DNA protector prevents degradation of end-blocked targeting RNA but not  
771 unmodified targeting RNA, while 2'-fluorination protects targeting RNA even in the  
772 absence of a DNA protector. It should be noted that the chemically synthesized end-  
773 blocked RNA, already shortened due to synthetic length restraints, is no longer visible  
774 post-DNase digestion because the ends of the end-blocked RNA contain DNA, which  
775 when degraded in the presence of DNase, causes the RNA band to shift downwards and  
776 off the gel. [B] After establishing end-blocked targeting RNA as a viable candidate, 120  
777 bp 2'-U (2'-U P) and unmodified (P) DNA protected end-blocked and fluorescently-  
778 labeled EWS/Fli1 targeting RNA were incubated with 400 bp copies of EWS/Fli1, EWS,  
779 and Fli1 mRNA for 48 hours in 1x PBS. The displaced strands were then treated with  
780 RNase H and subsequently run on a denaturing PAGE-Urea gel. RNase H should only  
781 degrade targeting RNA that is not displaced by the 400 bp RNA transcripts.  
782

783 **Figure 5. Conferring specificity using 2'-U DNA protected EWS/Fli1 targeting RNA.**

784 [A] Hypothesized mechanism of targeting RNA and 2'-U DNA protector induced  
785 cytotoxicity. In target cancer cells, cancerous mRNA is able to break the protector seal of  
786 the ORAD system and bind to the targeting RNA producing a dsRNA product that  
787 activates all the established dsRNA pathways. By binding to the targeting RNA however,  
788 the 2'-U DNA protector is released making it a potential substrate for RNA polymerase  
789 III. The 2'-U DNA protector then serves as a template for the transcription of hundreds to  
790 thousands of potential RNA transcripts that are similar in sequence to the targeting RNA,  
791 ultimately amplifying the cytotoxic potential of the ORAD system. The presence of 5'-  
792 triphosphate on the transcribed RNA only serves to enhance the effect. [B] 2'-U DNA  
793 protected 120 bp end-blocked EWS/Fli1 targeting RNA strands complexed at a 1:1 ratio  
794 by mass were transfected into A-673 and WPMY-1 cells using lipofectamine. When  
795 complexed at a 1:1 ratio, cell viability in WPMY-1 approaches non-toxic levels with  
796 cytotoxicity still apparent in A-673 cells. The use of a non-complementary EWS/Fli1  
797 sense RNA strand with the sense 2'-U DNA protector confers no protective benefit in  
798 WPMY-1 cells (ns = non-significant). [C] RT-qPCR was used to quantify transcribed  
799 RNA expression levels of EWS/Fli1 2'-U DNA protector in treated cells. In both A-673  
800 and WPMY-1 cells, a weak but significant (greater than unity which is indicated by the  
801 dotted line) transcribed 2'-U DNA signal is apparent that exceeds both non-specific  
802 signal from control untreated cells as well as signal that originates from DNA, the latter  
803 of which was determined by running a no reverse transcriptase (RT) control. Error bars  
804 represent the standard deviation of replicate conditions. Arrowheads signify 3' ends.  
805 Asterisks signify complementarity.

806

807

808

## 809 References

- 810 1. Collaborators, G.B.D.R.F. (2016) Global, regional, and national comparative  
811 risk assessment of 79 behavioural, environmental and occupational, and  
812 metabolic risks or clusters of risks, 1990-2015: a systematic analysis for the  
813 Global Burden of Disease Study 2015. *Lancet*, **388**, 1659-1724.
- 814 2. Chari, R.V. (2008) Targeted cancer therapy: conferring specificity to cytotoxic  
815 drugs. *Acc Chem Res*, **41**, 98-107.
- 816 3. Beerenwinkel, N., Schwarz, R.F., Gerstung, M. and Markowitz, F. (2015)  
817 Cancer evolution: mathematical models and computational inference. *Syst*  
818 *Biol*, **64**, e1-25.
- 819 4. Frieder, R.E., Snow, S.G., Francis, M.S. and Brodsky, B.S. (2015) The evolution  
820 of multigene panel testing for hereditary cancers. *Am J Obstet Gynecol*, **212**,  
821 123.
- 822 5. Ross, J.S. and Cronin, M. (2011) Whole cancer genome sequencing by next-  
823 generation methods. *Am J Clin Pathol*, **136**, 527-539.
- 824 6. SantaLucia, J., Jr. and Hicks, D. (2004) The thermodynamics of DNA structural  
825 motifs. *Annu Rev Biophys Biomol Struct*, **33**, 415-440.
- 826 7. Serra, M.J. and Turner, D.H. (1995) Predicting thermodynamic properties of  
827 RNA. *Methods Enzymol*, **259**, 242-261.
- 828 8. Sugimoto, N., Nakano, S., Katoh, M., Matsumura, A., Nakamuta, H., Ohmichi, T.,  
829 Yoneyama, M. and Sasaki, M. (1995) Thermodynamic parameters to predict  
830 stability of RNA/DNA hybrid duplexes. *Biochemistry*, **34**, 11211-11216.
- 831 9. Shu, D., Shu, Y., Haque, F., Abdelmawla, S. and Guo, P. (2011)  
832 Thermodynamically stable RNA three-way junction for constructing  
833 multifunctional nanoparticles for delivery of therapeutics. *Nat Nanotechnol*,  
834 **6**, 658-667.
- 835 10. Piao, X., Wang, H., Binzel, D.W. and Guo, P. (2018) Assessment and  
836 comparison of thermal stability of phosphorothioate-DNA, DNA, RNA, 2'-F  
837 RNA, and LNA in the context of Phi29 pRNA 3WJ. *RNA*, **24**, 67-76.
- 838 11. Zhang, D.Y., Chen, S.X. and Yin, P. (2012) Optimizing the specificity of nucleic  
839 acid hybridization. *Nat Chem*, **4**, 208-214.
- 840 12. Manche, L., Green, S.R., Schmedt, C. and Mathews, M.B. (1992) Interactions  
841 between double-stranded RNA regulators and the protein kinase DAI. *Mol*  
842 *Cell Biol*, **12**, 5238-5248.
- 843 13. Kawai, T. and Akira, S. (2007) Antiviral signaling through pattern recognition  
844 receptors. *J Biochem*, **141**, 137-145.
- 845 14. Hornung, V., Ellegast, J., Kim, S., Brzozka, K., Jung, A., Kato, H., Poeck, H., Akira,  
846 S., Conzelmann, K.K., Schlee, M. *et al.* (2006) 5'-Triphosphate RNA is the  
847 ligand for RIG-I. *Science*, **314**, 994-997.
- 848 15. Kato, H., Sato, S., Yoneyama, M., Yamamoto, M., Uematsu, S., Matsui, K.,  
849 Tsujimura, T., Takeda, K., Fujita, T., Takeuchi, O. *et al.* (2005) Cell type-  
850 specific involvement of RIG-I in antiviral response. *Immunity*, **23**, 19-28.
- 851 16. Kato, H., Takeuchi, O., Sato, S., Yoneyama, M., Yamamoto, M., Matsui, K.,  
852 Uematsu, S., Jung, A., Kawai, T., Ishii, K.J. *et al.* (2006) Differential roles of

- 853 MDA5 and RIG-I helicases in the recognition of RNA viruses. *Nature*, **441**,  
854 101-105.
- 855 17. Kawai, T., Takahashi, K., Sato, S., Coban, C., Kumar, H., Kato, H., Ishii, K.J.,  
856 Takeuchi, O. and Akira, S. (2005) IPS-1, an adaptor triggering RIG-I- and  
857 Mda5-mediated type I interferon induction. *Nat Immunol*, **6**, 981-988.
- 858 18. Saha, S.K., Pietras, E.M., He, J.Q., Kang, J.R., Liu, S.Y., Oganessian, G., Shahangian,  
859 A., Zarnegar, B., Shiba, T.L., Wang, Y. *et al.* (2006) Regulation of antiviral  
860 responses by a direct and specific interaction between TRAF3 and Cardif.  
861 *EMBO J*, **25**, 3257-3263.
- 862 19. Pichlmair, A., Schulz, O., Tan, C.P., Naslund, T.I., Liljestrom, P., Weber, F. and  
863 Reis e Sousa, C. (2006) RIG-I-mediated antiviral responses to single-stranded  
864 RNA bearing 5'-phosphates. *Science*, **314**, 997-1001.
- 865 20. Takahashi, K., Kawai, T., Kumar, H., Sato, S., Yonehara, S. and Akira, S. (2006)  
866 Roles of caspase-8 and caspase-10 in innate immune responses to double-  
867 stranded RNA. *J Immunol*, **176**, 4520-4524.
- 868 21. Yamamoto, M., Sato, S., Hemmi, H., Hoshino, K., Kaisho, T., Sanjo, H., Takeuchi,  
869 O., Sugiyama, M., Okabe, M., Takeda, K. *et al.* (2003) Role of adaptor TRIF in  
870 the MyD88-independent toll-like receptor signaling pathway. *Science*, **301**,  
871 640-643.
- 872 22. Buskiewicz, I.A., Koenig, A., Huber, S.A. and Budd, R.C. (2012) Caspase-8 and  
873 FLIP regulate RIG-I/MDA5-induced innate immune host responses to  
874 picornaviruses. *Future Virol*, **7**, 1221-1236.
- 875 23. Ghosh, S.K., Kusari, J., Bandyopadhyay, S.K., Samanta, H., Kumar, R. and Sen,  
876 G.C. (1991) Cloning, sequencing, and expression of two murine 2'-5'-  
877 oligoadenylate synthetases. Structure-function relationships. *J Biol Chem*,  
878 **266**, 15293-15299.
- 879 24. Diaz-Guerra, M., Rivas, C. and Esteban, M. (1997) Activation of the IFN-  
880 inducible enzyme RNase L causes apoptosis of animal cells. *Virology*, **236**,  
881 354-363.
- 882 25. Turc-Carel, C., Aurias, A., Mugneret, F., Lizard, S., Sidaner, I., Volk, C., Thiery,  
883 J.P., Olschwang, S., Philip, I., Berger, M.P. *et al.* (1988) Chromosomes in  
884 Ewing's sarcoma. I. An evaluation of 85 cases of remarkable consistency of  
885 t(11;22)(q24;q12). *Cancer Genet Cytogenet*, **32**, 229-238.
- 886 26. Tsugita, M., Yamada, N., Noguchi, S., Yamada, K., Moritake, H., Shimizu, K.,  
887 Akao, Y. and Ohno, T. (2013) Ewing sarcoma cells secrete EWS/Fli-1 fusion  
888 mRNA via microvesicles. *PLoS One*, **8**, e77416.
- 889 27. Mu, X., Greenwald, E., Ahmad, S. and Hur, S. (2018) An origin of the  
890 immunogenicity of in vitro transcribed RNA. *Nucleic Acids Res*, **46**, 5239-  
891 5249.
- 892 28. Matsukura, M., Shinozuka, K., Zon, G., Mitsuya, H., Reitz, M., Cohen, J.S. and  
893 Broder, S. (1987) Phosphorothioate analogs of oligodeoxynucleotides:  
894 inhibitors of replication and cytopathic effects of human immunodeficiency  
895 virus. *Proc Natl Acad Sci U S A*, **84**, 7706-7710.
- 896 29. Asthana, V., Tang, Y., Ferguson, A., Bugga, P., Asthana, A., Evans, E.R., Chen,  
897 A.L., Stern, B.S. and Drezek, R.A. (2018) An inexpensive, customizable

- 898 microscopy system for the automated quantification and characterization of  
899 multiple adherent cell types. *PeerJ*, **6**, e4937.
- 900 30. Kato, H., Takeuchi, O., Mikamo-Satoh, E., Hirai, R., Kawai, T., Matsushita, K.,  
901 Hiiragi, A., Dermody, T.S., Fujita, T. and Akira, S. (2008) Length-dependent  
902 recognition of double-stranded ribonucleic acids by retinoic acid-inducible  
903 gene-I and melanoma differentiation-associated gene 5. *J Exp Med*, **205**,  
904 1601-1610.
- 905 31. Donovan, J., Whitney, G., Rath, S. and Korennykh, A. (2015) Structural  
906 mechanism of sensing long dsRNA via a noncatalytic domain in human  
907 oligoadenylate synthetase 3. *Proc Natl Acad Sci U S A*, **112**, 3949-3954.
- 908 32. Donovan, J., Dufner, M. and Korennykh, A. (2013) Structural basis for  
909 cytosolic double-stranded RNA surveillance by human oligoadenylate  
910 synthetase 1. *Proc Natl Acad Sci U S A*, **110**, 1652-1657.
- 911 33. Nallagatla, S.R. and Bevilacqua, P.C. (2008) Nucleoside modifications  
912 modulate activation of the protein kinase PKR in an RNA structure-specific  
913 manner. *RNA*, **14**, 1201-1213.
- 914 34. Nallagatla, S.R., Toroney, R. and Bevilacqua, P.C. (2008) A brilliant disguise  
915 for self RNA: 5'-end and internal modifications of primary transcripts  
916 suppress elements of innate immunity. *RNA Biol*, **5**, 140-144.
- 917 35. Durbin, A.F., Wang, C., Marcotrigiano, J. and Gehrke, L. (2016) RNAs  
918 Containing Modified Nucleotides Fail To Trigger RIG-I Conformational  
919 Changes for Innate Immune Signaling. *MBio*, **7**.
- 920 36. Labno, A., Tomecki, R. and Dziembowski, A. (2016) Cytoplasmic RNA decay  
921 pathways - Enzymes and mechanisms. *Biochim Biophys Acta*, **1863**, 3125-  
922 3147.
- 923 37. Houseley, J. and Tollervey, D. (2009) The many pathways of RNA  
924 degradation. *Cell*, **136**, 763-776.
- 925 38. Ono, T., Scalf, M. and Smith, L.M. (1997) 2'-Fluoro modified nucleic acids:  
926 polymerase-directed synthesis, properties and stability to analysis by matrix-  
927 assisted laser desorption/ionization mass spectrometry. *Nucleic Acids Res*,  
928 **25**, 4581-4588.
- 929 39. Sousa, R. and Padilla, R. (1995) A mutant T7 RNA polymerase as a DNA  
930 polymerase. *EMBO J*, **14**, 4609-4621.
- 931 40. Integrated DNA Technologies. Vol. 2018.
- 932 41. Chiu, Y.H., Macmillan, J.B. and Chen, Z.J. (2009) RNA polymerase III detects  
933 cytosolic DNA and induces type I interferons through the RIG-I pathway. *Cell*,  
934 **138**, 576-591.
- 935 42. Shir, A. and Levitzki, A. (2002) Inhibition of glioma growth by tumor-specific  
936 activation of double-stranded RNA-dependent protein kinase PKR. *Nat*  
937 *Biotechnol*, **20**, 895-900.
- 938 43. Venkataraman, S., Dirks, R.M., Ueda, C.T. and Pierce, N.A. (2010) Selective cell  
939 death mediated by small conditional RNAs. *Proc Natl Acad Sci U S A*, **107**,  
940 16777-16782.
- 941 44. Bianchi, F., Pretto, S., Tagliabue, E., Balsari, A. and Sfondrini, L. (2017)  
942 Exploiting poly(I:C) to induce cancer cell apoptosis. *Cancer Biol Ther*, **18**,  
943 747-756.

- 944 45. Qu, J., Hou, Z., Han, Q., Zhang, C., Tian, Z. and Zhang, J. (2013) Poly(I:C)  
945 exhibits an anti-cancer effect in human gastric adenocarcinoma cells which is  
946 dependent on RLRs. *Int Immunopharmacol*, **17**, 814-820.
- 947 46. Matsumoto, M. and Seya, T. (2008) TLR3: interferon induction by double-  
948 stranded RNA including poly(I:C). *Adv Drug Deliv Rev*, **60**, 805-812.
- 949 47. Zamore, P.D., Tuschl, T., Sharp, P.A. and Bartel, D.P. (2000) RNAi: double-  
950 stranded RNA directs the ATP-dependent cleavage of mRNA at 21 to 23  
951 nucleotide intervals. *Cell*, **101**, 25-33.
- 952 48. Cooper, G.M. (1992) *Elements of human cancer*. Jones and Bartlett Publishers,  
953 Boston.
- 954 49. Webber, M.M., Trakul, N., Thraves, P.S., Bello-DeOcampo, D., Chu, W.W.,  
955 Storto, P.D., Huard, T.K., Rhim, J.S. and Williams, D.E. (1999) A human  
956 prostatic stromal myofibroblast cell line WPMY-1: a model for stromal-  
957 epithelial interactions in prostatic neoplasia. *Carcinogenesis*, **20**, 1185-1192.
- 958 50. Cidre-Aranaz, F. and Alonso, J. (2015) EWS/FLI1 Target Genes and  
959 Therapeutic Opportunities in Ewing Sarcoma. *Front Oncol*, **5**, 162.
- 960 51. Kailasan Vanaja, S., Rathinam, V.A., Atianand, M.K., Kalantari, P., Skehan, B.,  
961 Fitzgerald, K.A. and Leong, J.M. (2014) Bacterial RNA:DNA hybrids are  
962 activators of the NLRP3 inflammasome. *Proc Natl Acad Sci U S A*, **111**, 7765-  
963 7770.
- 964 52. Martinon, F., Burns, K. and Tschopp, J. (2002) The inflammasome: a  
965 molecular platform triggering activation of inflammatory caspases and  
966 processing of proIL-beta. *Mol Cell*, **10**, 417-426.
- 967 53. Suspene, R., Renard, M., Henry, M., Guetard, D., Puyraimond-Zemmour, D.,  
968 Billecocq, A., Bouloy, M., Tangy, F., Vartanian, J.P. and Wain-Hobson, S. (2008)  
969 Inversing the natural hydrogen bonding rule to selectively amplify GC-rich  
970 ADAR-edited RNAs. *Nucleic Acids Res*, **36**, e72.
- 971 54. Dieci, G., Fiorino, G., Castelnovo, M., Teichmann, M. and Pagano, A. (2007)  
972 The expanding RNA polymerase III transcriptome. *Trends Genet*, **23**, 614-622.
- 973 55. Lemaire, P.A., Anderson, E., Lary, J. and Cole, J.L. (2008) Mechanism of PKR  
974 Activation by dsRNA. *J Mol Biol*, **381**, 351-360.
- 975 56. Nanduri, S., Carpick, B.W., Yang, Y., Williams, B.R. and Qin, J. (1998) Structure  
976 of the double-stranded RNA-binding domain of the protein kinase PKR  
977 reveals the molecular basis of its dsRNA-mediated activation. *EMBO J*, **17**,  
978 5458-5465.
- 979 57. Reikine, S., Nguyen, J.B. and Modis, Y. (2014) Pattern Recognition and  
980 Signaling Mechanisms of RIG-I and MDA5. *Front Immunol*, **5**, 342.
- 981 58. Kolakofsky, D., Kowalinski, E. and Cusack, S. (2012) A structure-based model  
982 of RIG-I activation. *RNA*, **18**, 2118-2127.
- 983 59. Finn, O.J. (2012) Immuno-oncology: understanding the function and  
984 dysfunction of the immune system in cancer. *Ann Oncol*, **23** **Suppl 8**, viii6-9.
- 985 60. Zadeh, J.N., Steenberg, C.D., Bois, J.S., Wolfe, B.R., Pierce, M.B., Khan, A.R.,  
986 Dirks, R.M. and Pierce, N.A. (2011) NUPACK: Analysis and design of nucleic  
987 acid systems. *Journal of computational chemistry*, **32**, 170-173.

- 988 61. Cazenave, C., Frank, P., Toulme, J.J. and Busen, W. (1994) Characterization  
989 and subcellular localization of ribonuclease H activities from *Xenopus laevis*  
990 oocytes. *J Biol Chem*, **269**, 25185-25192.
- 991 62. Castanotto, D., Lin, M., Kowolik, C., Wang, L., Ren, X.Q., Soifer, H.S., Koch, T.,  
992 Hansen, B.R., Oerum, H., Armstrong, B. *et al.* (2015) A cytoplasmic pathway  
993 for gapmer antisense oligonucleotide-mediated gene silencing in mammalian  
994 cells. *Nucleic Acids Res*, **43**, 9350-9361.

995  
996

997

998

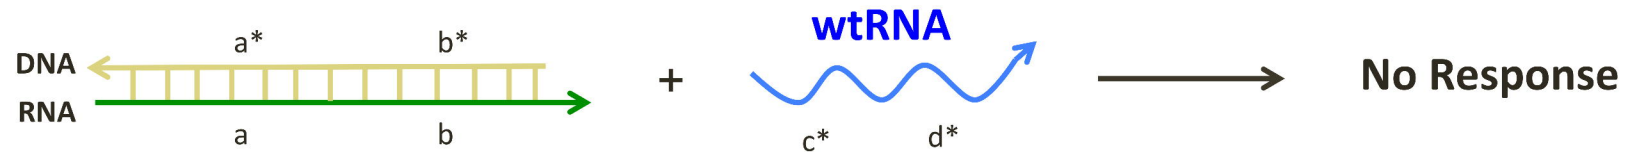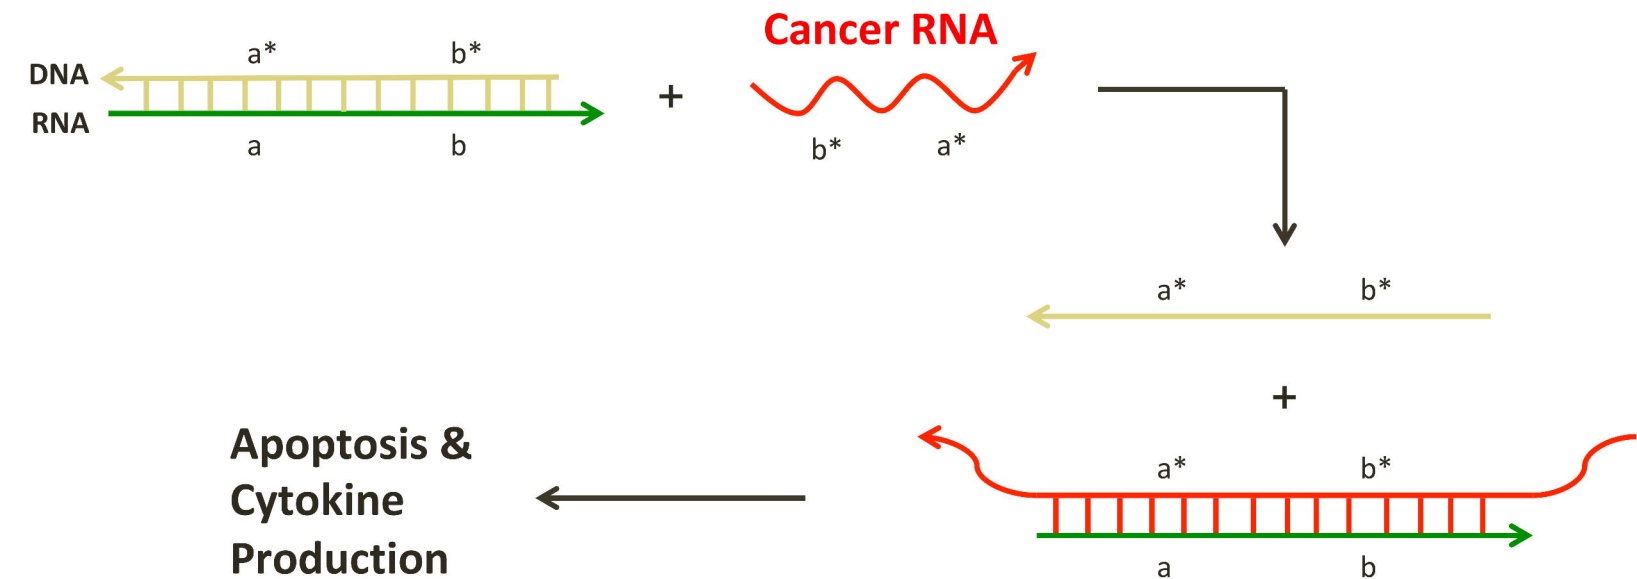



A

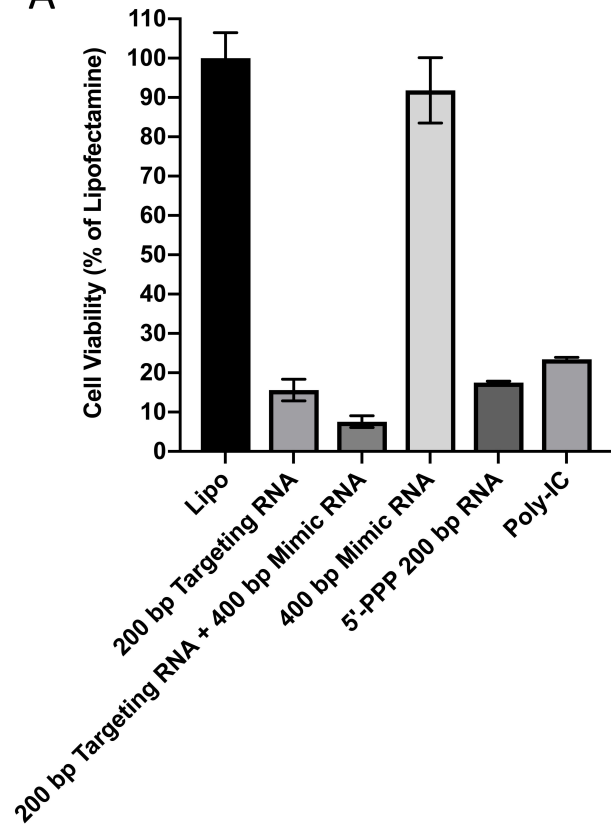

B

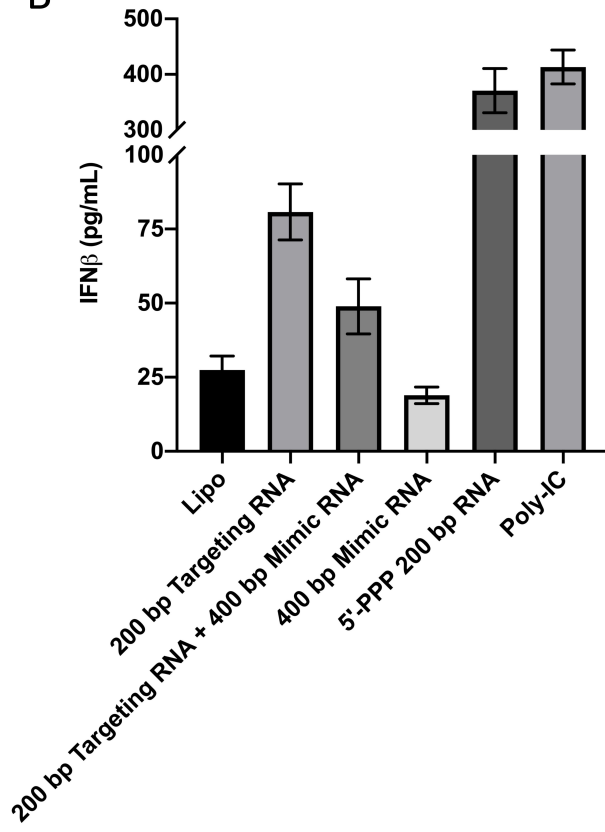

C

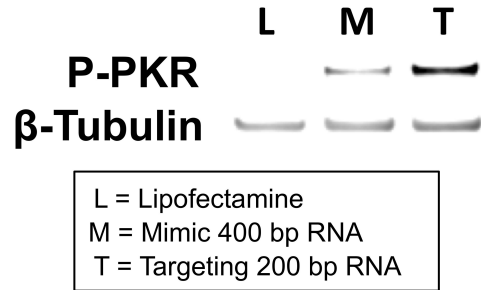

A

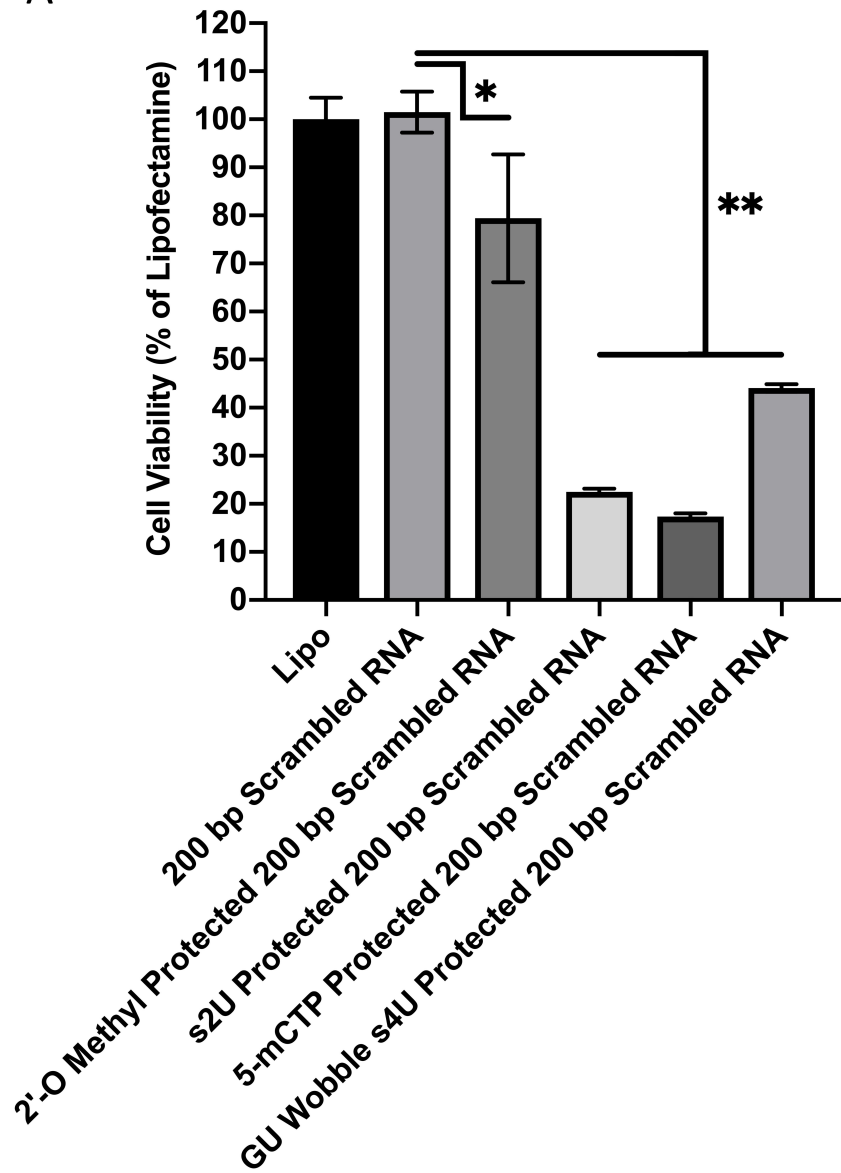

B

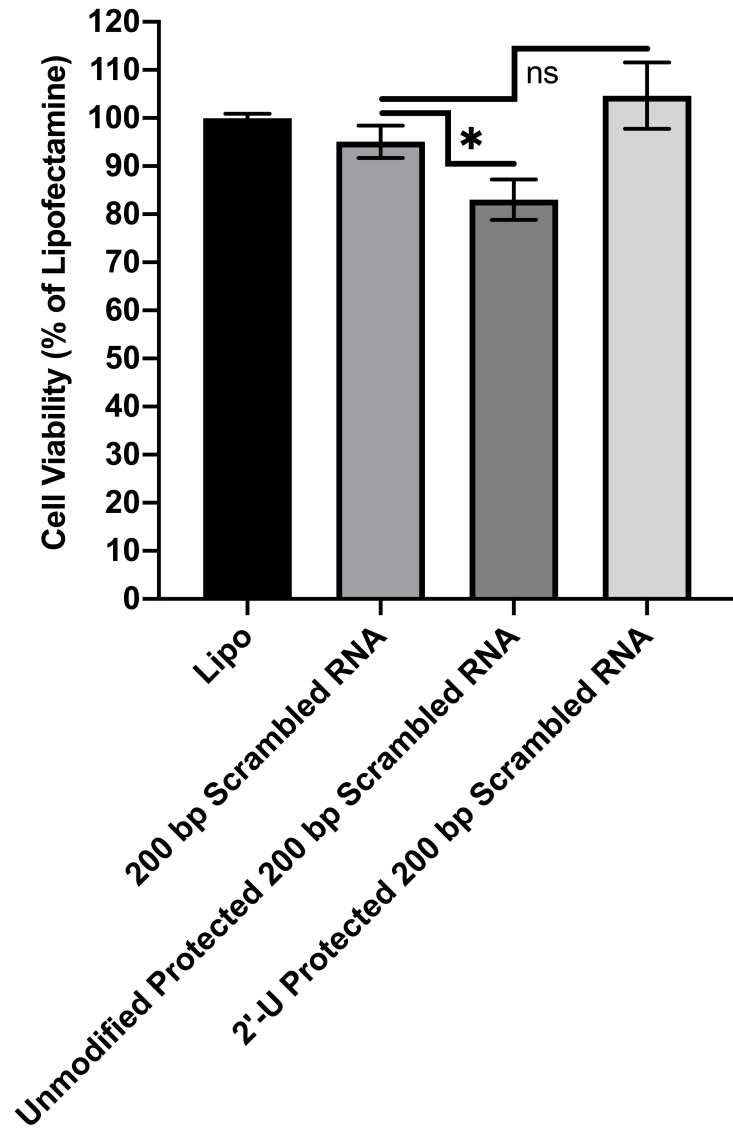

**A**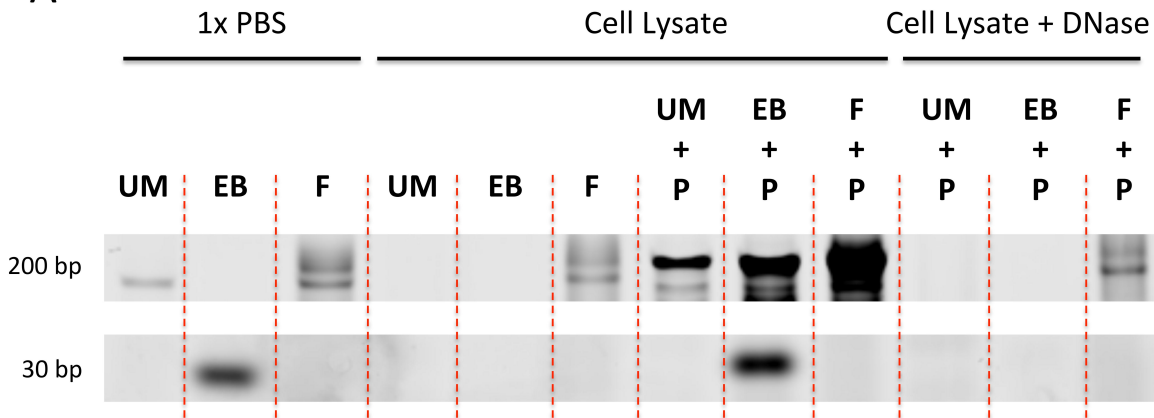

UM = Unmodified RNA

EB = End-Blocked RNA

F = Fluorinated RNA

P = DNA Protector

**B**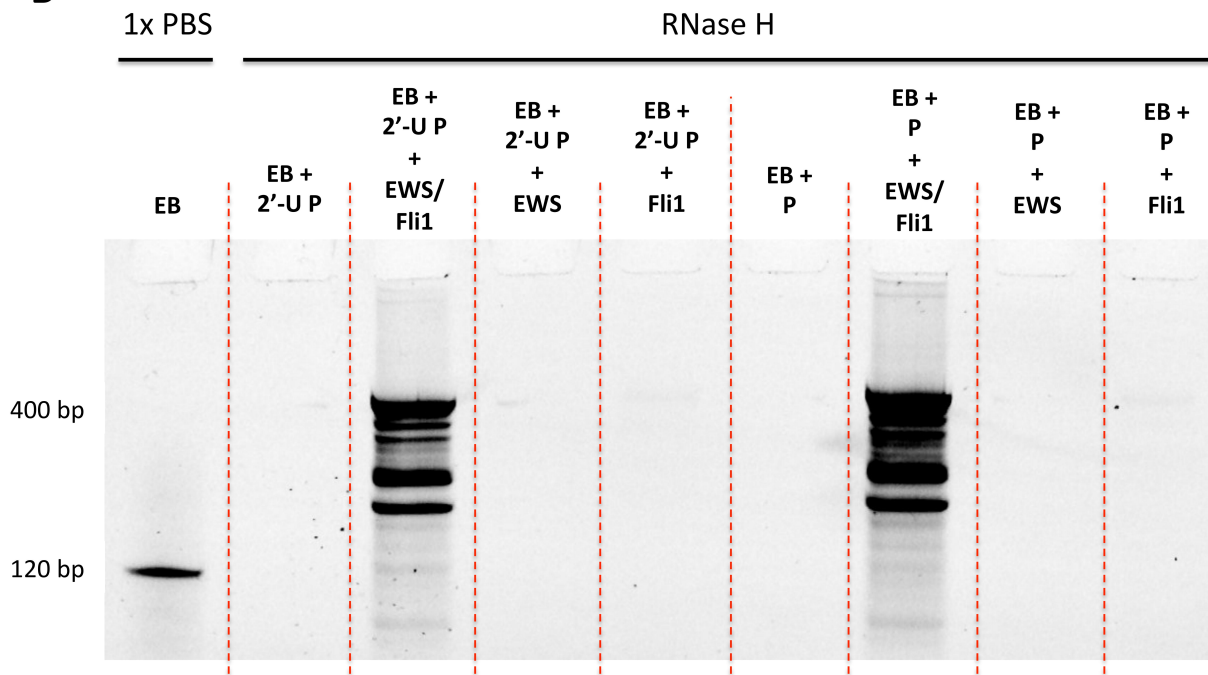

EB = End-Blocked RNA

2'-U P = 2'-U Modified DNA Protector

EWS/Fli1 = EWS/Fli1 Fusion RNA

EWS = EWS Wildtype RNA

Fli1 = Fli1 Wildtype RNA

**A**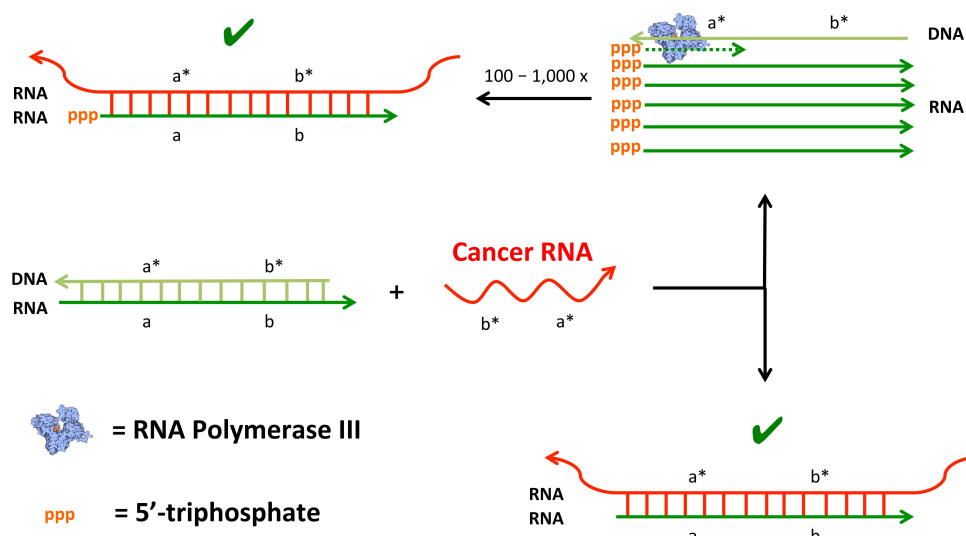**B**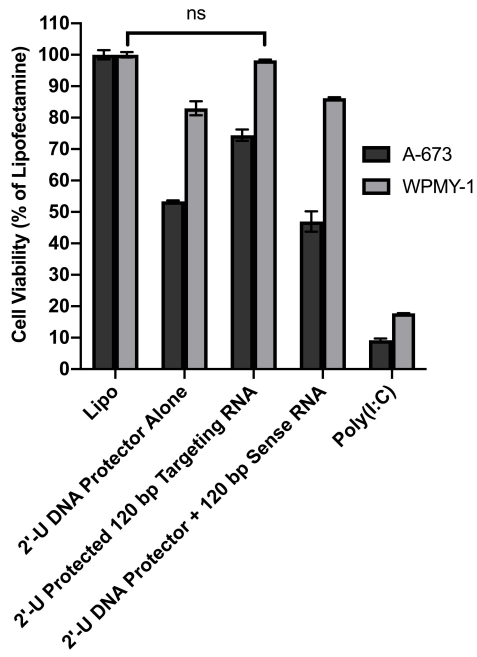**C**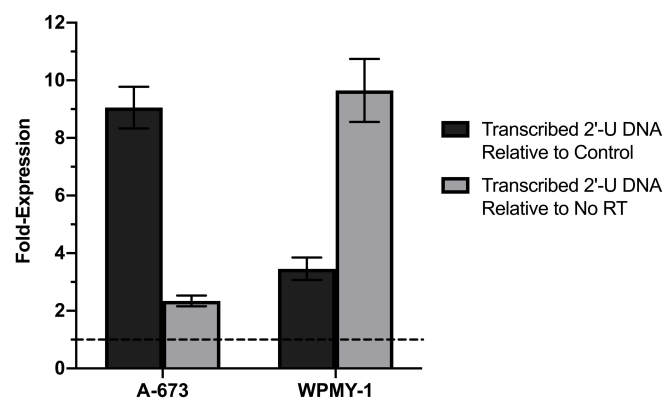

Source: https://www.biorxiv.org/content/10.1101/2020.04.22.055905v1.full.pdf
