# Supplementary material for: Development of a Novel Class of Self-Assembling dsRNA Cancer Therapeutics: a Proof of Concept Investigation
Source: bioRxiv or medRxiv preprint supplement (doi:10.1101/2020.04.22.055905), 2020-04-24
Supplement: Supplementary file [file media-2.pdf]

| Targeting RNA Strands                                | Sequence                                                                                                                                                                                                                                                                                                                                                                                                                                                                                                                                                                                                                                   | Notes                     |
|------------------------------------------------------|--------------------------------------------------------------------------------------------------------------------------------------------------------------------------------------------------------------------------------------------------------------------------------------------------------------------------------------------------------------------------------------------------------------------------------------------------------------------------------------------------------------------------------------------------------------------------------------------------------------------------------------------|---------------------------|
| <b>Scrambled 200 bp</b>                              | CAGGCAUUAAAGGGGAACGUAAGUUAAGCGCAAAAAACAGAGAAUAGGGCAAUUAUUUACUGUAUCGAAGAAUGGCCUGCGGAGGCAUGUGUCA<br>UGCUAGCGUUGCGGGGUACUCUAGUUAUCCAUUAGUGGUCCACAGGACACUCGUUUGCUUUGCGAAUUGCCUUUAUUGCGCCGGUUUACGCCACGCUUA                                                                                                                                                                                                                                                                                                                                                                                                                                      |                           |
| <b>EWS/Fli1 10/10 bp</b>                             | UAAGAAGGGUUCUGCUGCCC                                                                                                                                                                                                                                                                                                                                                                                                                                                                                                                                                                                                                       |                           |
| <b>EWS/Fli1 20/20 bp</b>                             | GACUGAGUCAUAAAGAGGGUUCUGCUGCCCUGAGCUGCUG                                                                                                                                                                                                                                                                                                                                                                                                                                                                                                                                                                                                   |                           |
| <b>EWS/Fli1 35/35 bp</b>                             | CCAAGCUCUUCUGACUGAGUCAUAAAGAGGGUUCUGCUGCCCUGAGCUGCUGCUGUUGGCUUAUUA                                                                                                                                                                                                                                                                                                                                                                                                                                                                                                                                                                         |                           |
| <b>EWS/Fli1 60/60 bp</b>                             | UGAGGCCAGAAUUAUGUUAUUGCCCCAAGCUCUUCUGACUGAGUCAUAAAGAGGGUUCUGCUGCCCUGAGCUGCUGCUCUGUUGGCCUAUUAUUGACUUGGA<br>GCUUUGGCUUAGGGAUC                                                                                                                                                                                                                                                                                                                                                                                                                                                                                                                |                           |
| <b>EWS/Fli1 70/70 bp</b>                             | CAGGCAAGGACUUAUUGUAGGCGCAGAAUUAUGUUAUUGCCCAAGCUCUUCUGACUGAGUCAUAAAGAGGGUUCUGCUGCCCUGAGCUGCUGCUGUUA<br>GGCUUAUUAUUGAGCUUGGAGCUUUGGCUUAGGUAUCCAGUUAUGGGG                                                                                                                                                                                                                                                                                                                                                                                                                                                                                     |                           |
| <b>EWS/Fli1 100/100 bp</b>                           | UUACUGAUCGUUUGUGCCCCUCAAGGGGAGGACUUUUGUUGAGGCCAGAAUUAUGUUAUUGCCCAAGCUCUUCUGACUGAGUCAUAAAGAGGGUUCUG<br>CUGCCCUGAGCUGCUGCUCUGUUGGCUUAUUAUUGAGCUGGAGCUUUGGCUUAGGUAUCCAGUUAUGGGGUGGGUAACUAGUUGGGAGGCGUCUGCCCAUA                                                                                                                                                                                                                                                                                                                                                                                                                                |                           |
| <b>EWS/Fli1 200/190 bp</b>                           | UUGCCACAGCUGGUAUCUGCCCCUUCAGGGUUGGCUAGGCGACUCUGGUCGGGCCAGGUAUCGUAACGGAUCUGGCUUGGGCCGUUGCUCUGUAUUUCUUAU<br>UGAUCGUUUGUGCCCCUCAAGGGGAGGACUUUUGUUGAGGCCAGAAUUAUGUUAUUGCCCAAGCUCUUCUGACUGAGUCAUAAAGAGGGUUCUGCUGC<br>CCGUAGCUGCUGCUCUGUUGGCCUAUUAUUGAGCUGGAGCUGGCUUAGGUAUCCAGUUAUGGGGUGGGUAACUAGUUGGGAGGCGUCUGCCCAUAGCUGCUUUGU<br>GACCAUAGCUACUCUGCUUCCAUAGCUGCUGCGUUGCCAUAGGUUUCUGCUGAGAGUAACUGCUCUGAUAUAACU                                                                                                                                                                                                                                   |                           |
| <b>EWS/Fli1 180/20 bp Fusion-Shifted</b>             | GGCAACGCUUCCAGGGUUGGCUAGGCGACUCUGGUCGGGCCAGGUAUCGUAACGGAUCUGGCUUGGGCCGUUGCUCUGUAUUCUUAUCUGAUCGUUUUGGCC<br>CUCCAAGGGGAGGACUUUUGUAGGCGCAAAUUAUGUUAUUGCCCAAGCUCUUCUGACUGAGUCAUAAAGAGGGUUCUGCUGCCCUGAGCUGCUG                                                                                                                                                                                                                                                                                                                                                                                                                                   |                           |
| <b>EWS/Fli1 2'-F 180/20 bp Fusion-Shifted</b>        | 2FG2FGC2FA2FAC2FGCUUCC2FA2FG2FGU2FG2FGCU2FA2FG2FGC2FG2FACU2FGCU2FG2FGUC2FG2FG2FGCCC2FA2FG2FG2FAU2FG2FA2FAC2FG<br>2FG2FAUCU2FG2FGCU2FG2FG2FGCC2FGU2FGCU2FGU2FAUUCU2FACU2FG2FACU2FGUU2FGU2FGCCCUCC2FA2FA2FG2FG2FG2FA2FG2F<br>G2FACUUU2FGU2FG2FA2FG2FGCC2FA2FG2FA2FAUUC2FAU2FGU2FAU2FGCC2FA2FA2FGCUUCUUCU2FG2FACU2FG2FA2FGUC2FAU2FA2FA2F<br>G2FA2FA2FG2FG2FGUUCU2FGCU2FGCC2FGU2FGCU2FGCU2FGCU2FG                                                                                                                                                                                                                                              | 2F = 2'-F                 |
| <b>EWS/Fli1 15/15 bp End-Blocked Pilot</b>           | dA*dG*dT*dCdAUAAAGAGGGUUCUGCUGCCCdGdTdA*dG*dC*                                                                                                                                                                                                                                                                                                                                                                                                                                                                                                                                                                                             | * = PS-bond, d = DNA base |
| <b>EWS/Fli1 100/20 bp Fusion-Shifted End-Blocked</b> | dA*dA*dT*dGdAGAUUCGUUUGGCCCUCCAAGGGGAGGACUUUUGUUGAGGCCAGAAUUAUGUUAUUGCCCAAGCUCUUCUGACUGAGUCAUAAAGAG<br>GGUUCUGCUGCCCUGAGC*dT*dG*dC*dT*dG                                                                                                                                                                                                                                                                                                                                                                                                                                                                                                   |                           |
| <b>DNA Protector Strands</b>                         |                                                                                                                                                                                                                                                                                                                                                                                                                                                                                                                                                                                                                                            |                           |
| <b>Scrambled 200 bp</b>                              | TGGCTGAAAACC GGCGCATAAAGGGCAAATCCGAAAGCAACGAGTGTCTGTGGACCATATGATAACTAGAGTACCCTGACGCTAGCATGACACATGCTCCCGAGG<br>CCATTCTCGATACAGTAAGAATAGATTCAATTCGCTATTTCTGTGTTTTTGCGCTATACTACGTTCCCTTAATTGCCTG                                                                                                                                                                                                                                                                                                                                                                                                                                              |                           |
| <b>Scrambled 200 bp 2'-U</b>                         | /IDEOXYU/GGC/IDEOXYU/GAAAACCGGCGCA/IDEOXYU/AAAGGGCAA/IDEOXYU/CCGAAGCAACGAG/IDEOXYU/G/IDEOXYU/CC/IDEOXYU/G/IDEOXYU/GG<br>ACCA/IDEOXYU/A/IDEOXYU/GGA/IDEOXYU/AAC/IDEOXYU/AGAG/IDEOXYU/ACCCGCGACGC/IDEOXYU/AGCA/IDEOXYU/GACACA/IDEOXYU/GCC/IDEOXYU/<br>CCGCGAGGCA/IDEOXYU//IDEOXYU/C/IDEOXYU//IDEOXYU/CGA/IDEOXYU/ACAG/IDEOXYU/AAGAA/IDEOXYU/AGA/IDEOXYU//IDEOXYU/CA/IDEOXYU//ID<br>EOXYU/CGCC/IDEOXYU/A/IDEOXYU//IDEOXYU//IDEOXYU/C/IDEOXYU/C/IDEOXYU/G/IDEOXYU//IDEOXYU//IDEOXYU//IDEOXYU//IDEOXYU//IDE<br>OXYU/GCGC/IDEOXYU/A/IDEOXYU/AC/IDEOXYU//IDEOXYU/ACG/IDEOXYU//IDEOXYU/CCCC/IDEOXYU//IDEOXYU/AA/IDEOXYU//IDEOXYU/GCC/IDEOXYU/<br>G | /IDEOXYU/ = 2'-U          |
| <b>Scrambled 200 bp 2'-O Methyl</b>                  | TGGCT2MGAAAACCGGCGCATAAAG2MGGCAAATCC2MGAAAGCAAC2MGAGTGTCT2MGTGGACCATATG2MGATAACTAGA2MGTACCCCGCAC2MGCTAGC<br>ATGACACAT2MGCTCC2MGGCAGGACATTCT2MGATACA2MGTAAGAATA2MGATTCAATC2MGCTATTTCT2MGTTTTTG2MGCTATACTTAC2MGTTCC<br>CTTAAT2MGCT2MG                                                                                                                                                                                                                                                                                                                                                                                                        | 2MG = 2'-O Methyl         |
| <b>EWS/Fli1 100/100 bp</b>                           | AGCCTCCACTAGTTACCCACCCAACTGGATCCTACAGCCAAGCTCCAAGTCAATATAGCCAACAGCAGCAGCTACGGGAGCAGAACCTTCTTATGACTCAGTCAG<br>AAGAGGAGCTTGGGGCAATAACATGAATTCTGGCCCTCAACAAAAGTCTCCCTTGGAGGGGCACAACGATCAGTAA                                                                                                                                                                                                                                                                                                                                                                                                                                                  |                           |
| <b>EWS/Fli1 180/20 bp Fusion-Shifted</b>             | GGGAGCAGAACCTTCTTATGACTCAGTCAGAAAGAGGAGCTTGGGGCAATAACATGAATTCTGGCCCTCAACAAAAGTCTCCCTTGGAGGGGCACAACGATCAGTAA<br>AATACAGAGCAACGGCCGACAGATCGATATCAGATCCTGGGCGGACAGCAGTCGCTAGCCCAACCTGGAAGCGCTGCTGCC                                                                                                                                                                                                                                                                                                                                                                                                                                           |                           |
| <b>EWS/Fli1 15/15 bp End-Blocked Pilot</b>           | G*G*G* C*AG CAG AAC CC/IDEOXYU// /IDEOXYU/C/IDEOXYU// /IDEOXYU/A/IDEOXYU/ GAC /IDEOXYU/A                                                                                                                                                                                                                                                                                                                                                                                                                                                                                                                                                   | /IDEOXYU/ = 2'-U          |
| <b>EWS/Fli1 100/20 bp Fusion-Shifted End-Blocked</b> | ACG GGC AGC AGA ACC C/IDEOXYU// /IDEOXYU// /IDEOXYU// /IDEOXYU// /A/IDEOXYU// /A/IDEOXYU// /G AC/ /IDEOXYU// /CAG / /IDEOXYU// /CA GAA GAG GAG<br>C/ /IDEOXYU// / /GGG GCA A/ /IDEOXYU// /A ACA / /IDEOXYU// /GA A/ /IDEOXYU// / /C/ /IDEOXYU// /G GCC / /IDEOXYU// /CA ACA AAA G/ /IDEOXYU// /C<br>C/ /IDEOXYU// /C CCC / /IDEOXYU// / /G GAG GGG CAC AAA CGA / /IDEOXYU// /C/ /IDEOXYU// /CA/ /IDEOXYU// / / / /                                                                                                                                                                                                                         | /IDEOXYU/ = 2'-U          |
| <b>RNA Protector Strands</b>                         |                                                                                                                                                                                                                                                                                                                                                                                                                                                                                                                                                                                                                                            |                           |
| <b>Scrambled 200 bp s2U</b>                          | S2UGGCS2UGAAAACCGGCGCAS2UAAAGGGCAAAS2UCCGAAAGCAACGAGS2UGS2UCCS2UGS2UGGACCAS2UAS2UGGAS2UAAACS2UAGAGS2UACCCCGCAGC<br>CS2UAGCAS2UGACAS2UGCCS2UCCGCGAGGCCAS2US2UCS2US2UCGAS2UACAGS2UAAAGAS2UAGAS2US2UCAS2US2UCGCCS2UAS2US2US2UCS2US2<br>GS2US2US2US2US2US2UGGCS2UAS2UACS2US2UACGS2US2UCCCS2US2UAS2US2UGCS2UG                                                                                                                                                                                                                                                                                                                                   | S2U = 2-Thiouridine       |
| <b>Scrambled 200 bp s4U GU Wobble</b>                | S4UGGCS4UGAGAACC GGCGS4UAAAGGGCAAAS4UCCGAGAGCAACGGG4UGS4UCS4UGS4UGGACGS4UAS4UGGAS4UAGCS4UAGAGS4UGCCCGCAGC<br>CS4UGGAS4UAGCAS4UGCCS4UCCGCGGGGCGS4US4UCS4US4UCGAS4UACGAS4UAAAGAS4UAGAS4US4UCAS4US4UCGCCS4UGS4US4US4UCS4UCS4<br>UGS4US4US4US4US4US4UGGCS4UGS4UACS4US4UACGS4US4UCCCS4US4UGAS4US4UGCCS4UG                                                                                                                                                                                                                                                                                                                                       | S4U = 4-Thiouridine       |

|                                     |                                                                                                                                                                                                                                                                                                                                                                                                                                                                                                                                                                                                                                                                                                                                                                                                                                                                                                                           |                        |
|-------------------------------------|---------------------------------------------------------------------------------------------------------------------------------------------------------------------------------------------------------------------------------------------------------------------------------------------------------------------------------------------------------------------------------------------------------------------------------------------------------------------------------------------------------------------------------------------------------------------------------------------------------------------------------------------------------------------------------------------------------------------------------------------------------------------------------------------------------------------------------------------------------------------------------------------------------------------------|------------------------|
| <b>Scrambled 200 bp 5-mCTP</b>      | UGG5MCUGAAA5MC5MCGG5MCG5MCAUAAAGGG5MCAAU5MC5MCGAAAG5MCAA5MCGAGUGU5MC5MCUGUGGA5MC5MCAUUGGAUAA5MCUAG<br>AGUA5MC5MC5MC5MCG5MCA5MCG5MCUAG5MCAUGA5MCA5MCAUG5MC5MCU5MC5MCG5MCGAGG5MC5MCAU5MCU5MCGAU5MCAUGAAGA<br>AUAGAU5MCAU5MCG5MC5MCUAAU5MCU5MCUGUUUUUU5MCG5MCAU5MCUUA5MCGU5MC5MC5MCUAAUUG5MC5MCUG                                                                                                                                                                                                                                                                                                                                                                                                                                                                                                                                                                                                                            | 5MC = 5-methylcytidine |
| <b>Truncated mRNA Sense Strands</b> |                                                                                                                                                                                                                                                                                                                                                                                                                                                                                                                                                                                                                                                                                                                                                                                                                                                                                                                           |                        |
| <b>EWS/Fli1 400 bp</b>              | AGTTATGAT CAGAGCAGTT ACTCTCAGCAGAACCTAT GGGCAACCGA GCAGCTATGG ACAGCAGAGT AGCTATGGTC AACAAAGCAGCTATGGGCAG<br>CAGCCTCCCA CTAGTTACCC ACCCCAAACT GGATCCTACA GCCAAGCTCCAAGTCAATAT AGCCAACAGA GCAGCAGCTA CGGGCAGCAG AACCTTCT TATGACTCAG<br>TCAGAAGAGGAGCTTGGGGC AATAACATGA ATTCTGGCCT CAACAAAAGT CCTCCCCTTG GAGGGGCACA AACGATCAGT AAGAATACAG AGCAACGGCC<br>CCAGCCAGAT CCGTATCAGA TCCTGGGCC GACCAGCAGT CGCCTAGCCA ACCCTGGAAG CGGGCAGATC CAGCTGTGGC AA                                                                                                                                                                                                                                                                                                                                                                                                                                                                            |                        |
| <b>EWS 400 bp</b>                   | AGTTATGAT CAGAGCAGTT ACTCTCAGCA GAACACCTAT GGGCAACCGA GCAGCTATGG ACAGCAGAGT AGCTATGGTC AACAAAGCAG CTATGGGCAG<br>CAGCCTCCCA CTAGTTACCC ACCCCAAACT GGATCCTACA GCCAAGCTCC AAGTCAATAT AGCCAACAGA GCAGCAGCTA CGGGCAGCAG AGTTCATTCC<br>GACAGGACCA CCCAGTAGC ATGGGTGTTT ATGGGCAGGA GTCTGGAGGA TTTTCCGGAC CAGGAGAGAA CCGGAGCATG AGTGGCCCTG ATAACCGGGG<br>CAGGGGAAGA GGGGGATTG ATCGTGGAGG CATGAGCAGA GGTGGGCGGG GAGGAGGACG CGGTGGAATG GGCCTGGAG AGCGAGGTGG TTCAATAA<br>GGAGATCG ACACATCCTT TTTCCAGAAC ATGGATGGCA AGGAACTGTG TAAAATGAAC AAGGAGGACT TCCTCCGCGC CACCACCTC TACAACACGG<br>AAGTGCTGTG GTCACACCTC AGTTACTCA GGGAAAGTTC ACTGCTGGCC TATAATACAA CCTCCACAC CGACCAATCC TCACGATTGA GTGTCAAAGA<br>AGACCTTCT TATGACTCAG TCAGAAGAGG AGCTTGGGC AATAACATGA ATTCTGGCCT CAACAAAAGT CCTCCCCTTG GAGGGGCACA AACGATCAGT<br>AAGAATACAG AGCAACGGCC CCAGCCAGAT CCGTATCAGA TCCTGGGCC GACCAGCAGT CGCCTAGCCA ACCCTGGAAG CGGGCAGATC CAGCTGTGGC AA |                        |
| <b>Fli1 400 bp</b>                  |                                                                                                                                                                                                                                                                                                                                                                                                                                                                                                                                                                                                                                                                                                                                                                                                                                                                                                                           |                        |
| <b>Primers</b>                      |                                                                                                                                                                                                                                                                                                                                                                                                                                                                                                                                                                                                                                                                                                                                                                                                                                                                                                                           |                        |
| <b>EWS/Fli1 mRNA</b>                | F primer: CAGCAGAGTAGCTATGGTCAAC; R primer: GGCCGTTGCTCTGTATTCTTA                                                                                                                                                                                                                                                                                                                                                                                                                                                                                                                                                                                                                                                                                                                                                                                                                                                         |                        |
| <b>EWS mRNA</b>                     | F primer: CAGCAGAGTAGCTATGGTCAAC; R primer: TCCGGAAAATCCTCCAGAC                                                                                                                                                                                                                                                                                                                                                                                                                                                                                                                                                                                                                                                                                                                                                                                                                                                           |                        |
| <b>Fli1 mRNA</b>                    | F primer: GGATGGCAAGGAACTGTGTA; R primer: GGCCGTTGCTCTGTATTCTTA                                                                                                                                                                                                                                                                                                                                                                                                                                                                                                                                                                                                                                                                                                                                                                                                                                                           |                        |
| <b>GAPDH mRNA</b>                   | F primer: GGGTGTGAACCATGAGAAGTAT; R primer: AGTAGAGGCAGGGATGATGT                                                                                                                                                                                                                                                                                                                                                                                                                                                                                                                                                                                                                                                                                                                                                                                                                                                          |                        |
| <b>2'-U Transcribed DNA RT-qPCR</b> | F primer: GAGGACTTTTGTGAGGCCAG; R primer = CAGTCAGAAGAGGAGCTTGGG                                                                                                                                                                                                                                                                                                                                                                                                                                                                                                                                                                                                                                                                                                                                                                                                                                                          |                        |
| <b>PKR mRNA</b>                     | F primer: GGTACAGTTTCTACTAACAGG; R primer: GAAAAGTGGCCAAATCCACC                                                                                                                                                                                                                                                                                                                                                                                                                                                                                                                                                                                                                                                                                                                                                                                                                                                           |                        |
| <b>RIG-I mRNA</b>                   | F primer: TGTTCTCAGATCCCTTGGATG; R primer: CACTGCTCACCAGATTGCAT                                                                                                                                                                                                                                                                                                                                                                                                                                                                                                                                                                                                                                                                                                                                                                                                                                                           |                        |
| <b>OAS3 mRNA</b>                    | F primer: CCGAACTGTCTGGCCTGATCC; R primer: CCCATTCCCAGTCCCATGTGG                                                                                                                                                                                                                                                                                                                                                                                                                                                                                                                                                                                                                                                                                                                                                                                                                                                          |                        |
